# Supplementary material for: Practice of function-oriented synthesis: high-efficiency CO2 conversion and Knoevenagel condensation by two novel In3-based MOFs with high-density active sites under mild conditions
Source: Royal Society of Chemistry journal article supplement (doi:10.1039/d2ta03524c), 2022-01-01
Supplement: d2ta03524c1.pdf [file d2ta03524c1.pdf]

## Electronic Supplementary Information

### Practice of Function-Oriented Synthesis: High-Efficiency CO<sub>2</sub> Conversion and Knoevenagel Condensation by Two Novel In<sub>3</sub>-based MOFs with High-Density Active Sites under Mild Conditions

*Junyi Qiao, Borong Zhang, Lirong Zhang, and Yunling Liu\**

State Key Laboratory of Inorganic Synthesis and Preparative Chemistry, College of Chemistry, Jilin University, Changchun 130012, P. R. China. Email: yunling@jlu.edu.cn

#### Table of Contents:

|                                                                                                                    |     |
|--------------------------------------------------------------------------------------------------------------------|-----|
| S1. Synthesis of H <sub>3</sub> BTCTBA ligand.                                                                     | S1  |
| S2. Crystallographic data and structures of <b>JLU-MOF116</b> and <b>JLU-MOF117</b> .                              | S2  |
| S3. PXRD patterns, TGA analyses and N <sub>2</sub> sorption isotherms of <b>JLU-MOF116</b> and <b>JLU-MOF117</b> . | S5  |
| S4. CO <sub>2</sub> conversions with epoxides catalyzed by <b>JLU-MOF116</b> and <b>JLU-MOF117</b> .               | S8  |
| S5. Knoevenagel condensation reactions catalyzed by <b>JLU-MOF116</b> and <b>JLU-MOF117</b> .                      | S21 |

## S1. Synthesis of H<sub>3</sub>BTCTBA ligand.

### Synthesis of 4,4',4''-[1,3,5-benzenetriyltris(carbonylimino)]trisbenzoic acid (H<sub>3</sub>BTCTBA)

H<sub>3</sub>BTCTBA ligand was synthesized according to a literature with slight modifications.<sup>1</sup> 4-aminobenzoic acid (6.0 g, 23.4 mmol) and K<sub>2</sub>CO<sub>3</sub> (13.0 g, 92 mmol) were dissolved in 120 mL dry acetone and stirred under N<sub>2</sub> atmosphere at room temperature for 15 min. A solution of 1,3,5-benzenetricarbonyltrichloride (12.6 g, 92 mmol) in 60 mL acetone was added slowly in 10 min. The mixture was stirred at 65 °C overnight. After cooling, the resultant precipitate was separated by filtration, washed with water (200 mL) and acetone (30 mL), and then dried at 60 °C under vacuum to obtain H<sub>3</sub>BTCTBA as white solid.

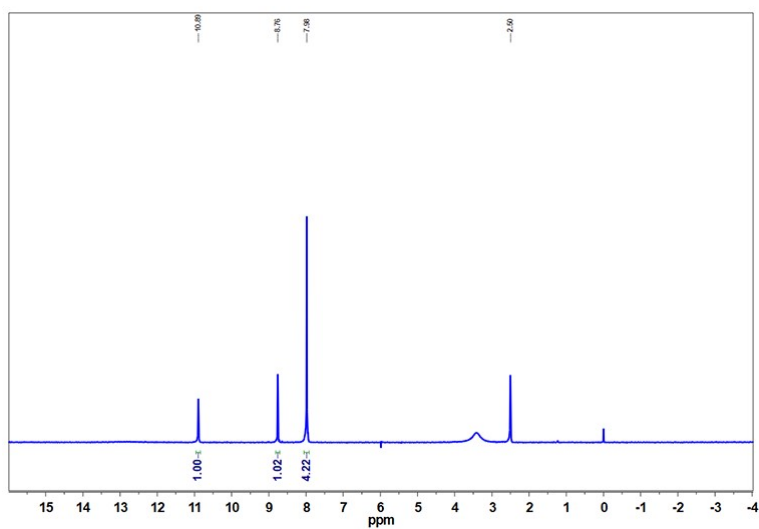

Fig. S1. <sup>1</sup>H NMR spectrum of H<sub>3</sub>BTCTBA.

## S2. Crystallographic data and structures of JLU-MOF116 and 117.

Table S1. Crystal data and structure refinement of JLU-MOF116.

| Compound                                  | JLU-MOF116                                                                     |
|-------------------------------------------|--------------------------------------------------------------------------------|
| Formula                                   | C <sub>46</sub> H <sub>26</sub> In <sub>3</sub> N <sub>4</sub> O <sub>20</sub> |
| Formula Weight                            | 1299.17                                                                        |
| Temperature (K)                           | 293(2)                                                                         |
| Crystal System                            | Tetragonal                                                                     |
| Space Group                               | <i>P4<sub>2</sub>/mnm</i>                                                      |
| a (Å)                                     | 30.241(4)                                                                      |
| b (Å)                                     | 30.241(4)                                                                      |
| c (Å)                                     | 18.297(4)                                                                      |
| α (°)                                     | 90                                                                             |
| β (°)                                     | 90                                                                             |
| γ (°)                                     | 90                                                                             |
| V (Å <sup>3</sup> )                       | 16734(6)                                                                       |
| Z, ρ <sub>calc</sub> (g/cm <sup>3</sup> ) | 4, 0.516                                                                       |
| μ (mm <sup>-1</sup> )                     | 0.434                                                                          |
| F(000)                                    | 2548.0                                                                         |
| 2θ Range for Data Collection (°)          | 5.984 to 54.962                                                                |
| Reflections Collected                     | 153985                                                                         |
| Independent Reflections                   | 10112 [R <sub>int</sub> = 0.1321, R <sub>sigma</sub> = 0.0526]                 |
| Data/Restraints/Parameters                | 10112/275/254                                                                  |
| Goodness-of-fit on F <sup>2</sup>         | 1.016                                                                          |
| Final R Indexes [I ≥ 2σ (I)]              | R <sub>1</sub> <sup>a</sup> = 0.0542, wR <sub>2</sub> <sup>b</sup> = 0.1543    |
| Final R Indexes [all data]                | R <sub>1</sub> <sup>a</sup> = 0.0779, wR <sub>2</sub> <sup>b</sup> = 0.1648    |

<sup>a</sup>  $R_1 = \frac{\sum (|F_o| - |F_c|)}{\sum |F_o|}$ , <sup>b</sup>  $wR_2 = \left[ \frac{\sum w(|F_o|^2 - |F_c|^2)^2}{\sum w(F_o^2)^2} \right]^{1/2}$

Table S2. Crystal data and structure refinement of **JLU-MOF117**.

| Compound                                  | JLU-MOF117                                                                     |
|-------------------------------------------|--------------------------------------------------------------------------------|
| Formula                                   | C <sub>60</sub> H <sub>30</sub> In <sub>3</sub> N <sub>6</sub> O <sub>22</sub> |
| Formula Weight                            | 1531.36                                                                        |
| Temperature (K)                           | 302.16                                                                         |
| Crystal System                            | Orthorhombic                                                                   |
| Space Group                               | <i>Imma</i>                                                                    |
| a (Å)                                     | 20.1206(4)                                                                     |
| b (Å)                                     | 28.9071(7)                                                                     |
| c (Å)                                     | 29.2586(7)                                                                     |
| α (°)                                     | 90                                                                             |
| β (°)                                     | 90                                                                             |
| γ (°)                                     | 90                                                                             |
| V (Å <sup>3</sup> )                       | 17017.6(7)                                                                     |
| Z, ρ <sub>calc</sub> (g/cm <sup>3</sup> ) | 4, 0.598                                                                       |
| μ (mm <sup>-1</sup> )                     | 0.433                                                                          |
| F(000)                                    | 3020.0                                                                         |
| 2θ Range for Data Collection (°)          | 4.508 to 50.700                                                                |
| Reflections Collected                     | 33311                                                                          |
| Independent Reflections                   | 8133 [R <sub>int</sub> = 0.0851, R <sub>sigma</sub> = 0.0989]                  |
| Data/Restraints/Parameters                | 8133/20/263                                                                    |
| Goodness-of-fit on F <sup>2</sup>         | 0.947                                                                          |
| Final R Indexes [I ≥ 2σ (I)]              | R <sub>1</sub> <sup>a</sup> = 0.0411, wR <sub>2</sub> <sup>b</sup> = 0.1065    |
| Final R Indexes [all data]                | R <sub>1</sub> <sup>a</sup> = 0.0602, wR <sub>2</sub> <sup>b</sup> = 0.1132    |

$$^a R_1 = \sum ||F_o| - |F_c|| / \sum |F_o|, ^b wR_2 = [\sum w(|F_o|^2 - |F_c|^2) / \sum w(F_o^2)]^{1/2}$$

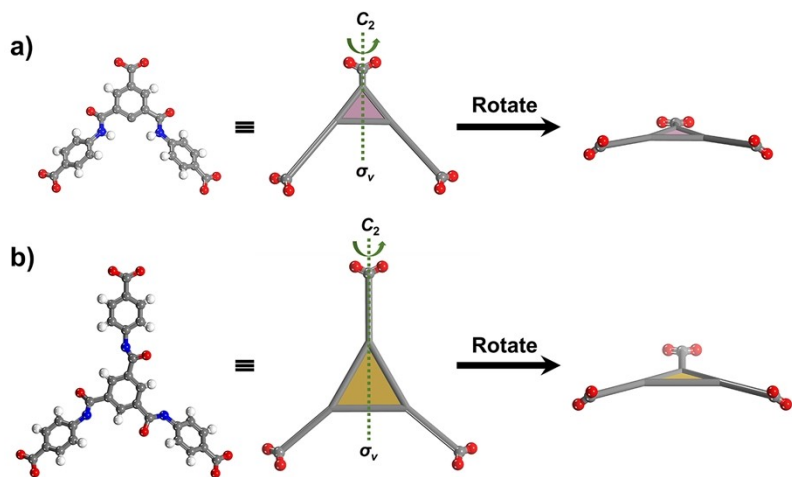

Fig. S2. Molecular symmetries of BCPACBA and BTCTBA.

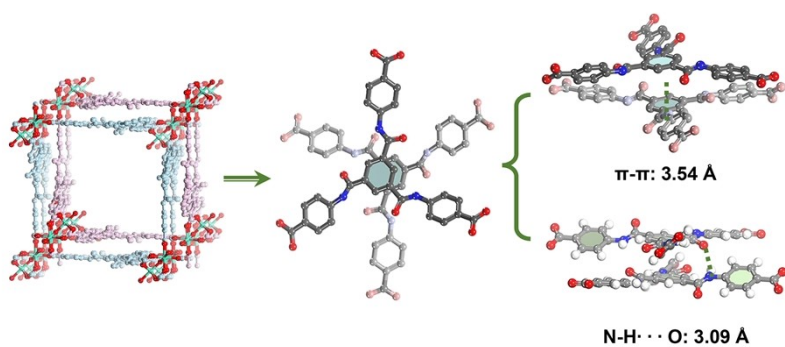

Fig. S3. The 2-fold interpenetration framework of **JLU-MOF117** showing N-H...O hydrogen-bond interactions and  $\pi$ - $\pi$  interactions between the two adjacent BTCTBA ligands.

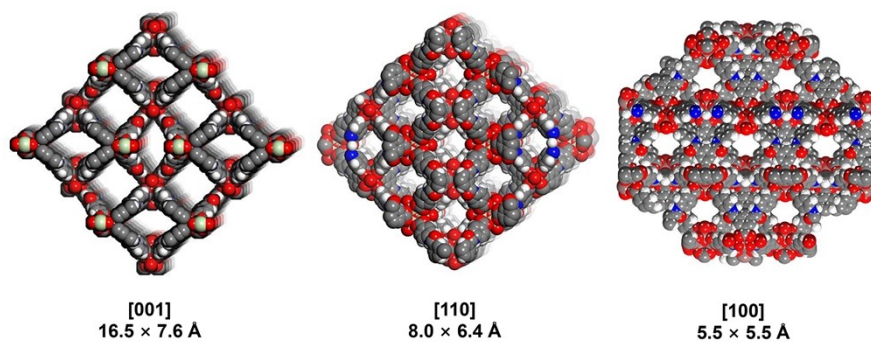

Fig. S4. CPK models of **JLU-MOF116** framework along the [001], [110], and [100] directions.

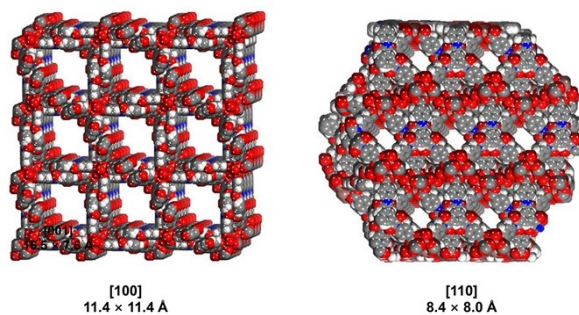

Fig. S5. CPK models of **JLU-MOF117** framework along the [100] and [110] directions.

### S3. PXRD patterns, TGA analyses and N<sub>2</sub> sorption isotherms of JLU-MOF116 and 117.

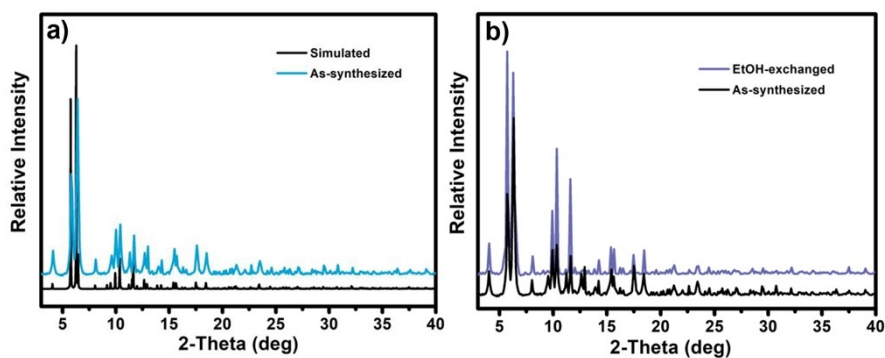

Fig. S6. PXRD patterns of a) simulated, as-synthesized, and b) EtOH-exchanged JLU-MOF116.

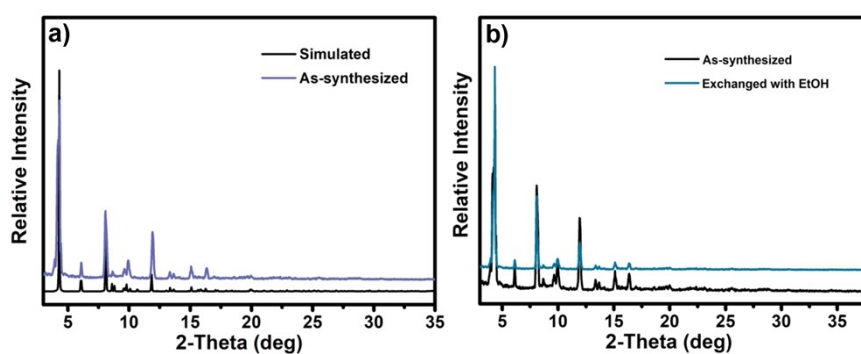

Fig. S7. PXRD patterns of a) simulated, as-synthesized, and b) EtOH-exchanged JLU-MOF117.

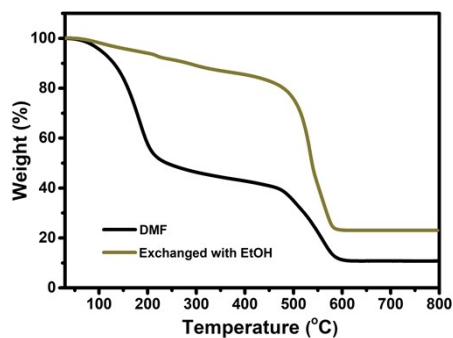

Fig. S8. TGA curves of the as-synthesized and ethanol-exchanged JLU-MOF116.

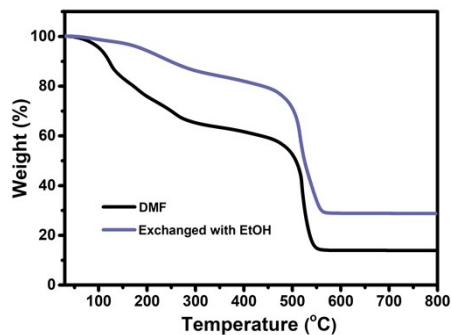

Fig. S9. TGA curves of the as-synthesized and ethanol-exchanged JLU-MOF117.

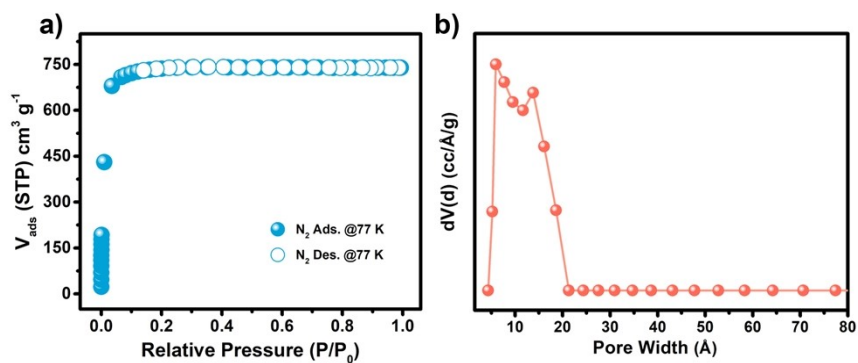

Fig. S10. a)  $N_2$  adsorption-desorption isotherm and b) pore size distribution of **JLU-MOF116**.

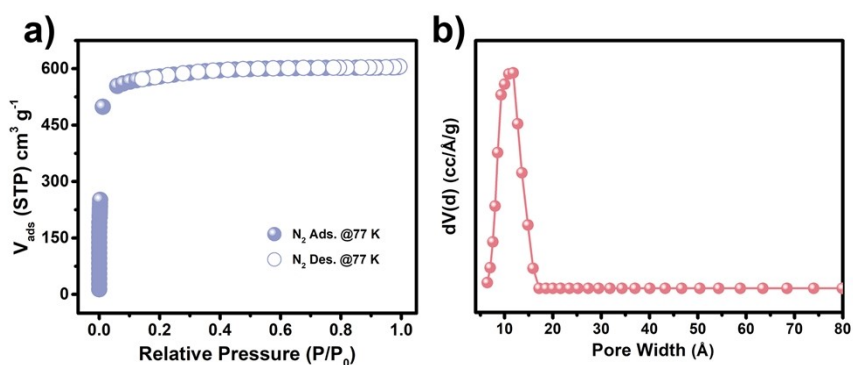

Fig. S11. a)  $N_2$  adsorption-desorption isotherm and b) pore size distribution of **JLU-MOF117**.

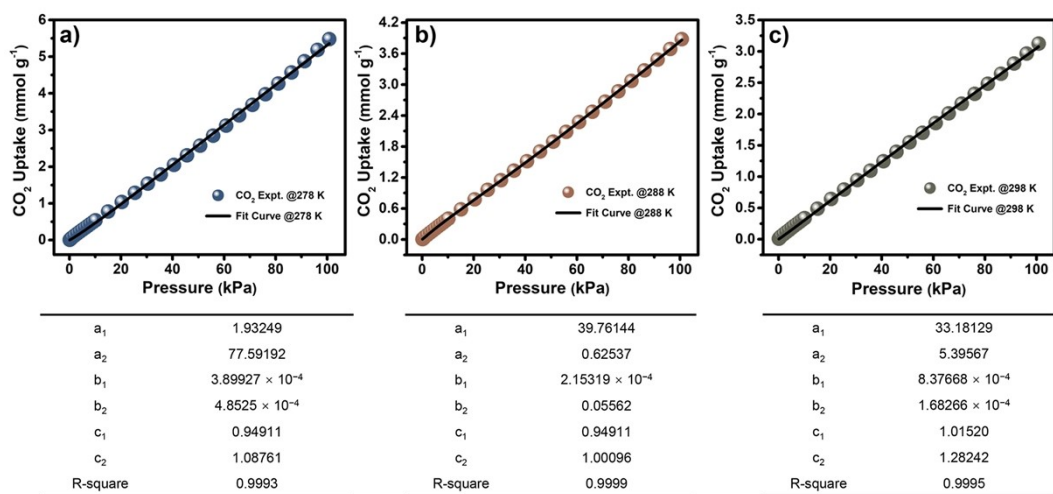

Fig. S12. Fitting curves and parameters of  $CO_2$  adsorption isotherms of **JLU-MOF116** at a) 278, b) 288, and c) 298 K.

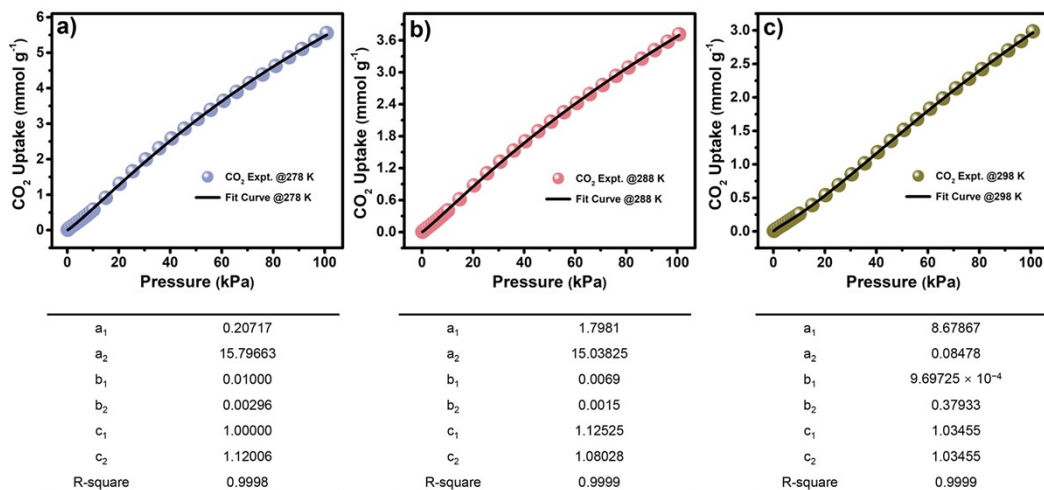

Fig. S13. Fitting curves and parameters of CO<sub>2</sub> adsorption isotherms of **JLU-MOF117** at a) 278, b) 288, and c) 298 K.

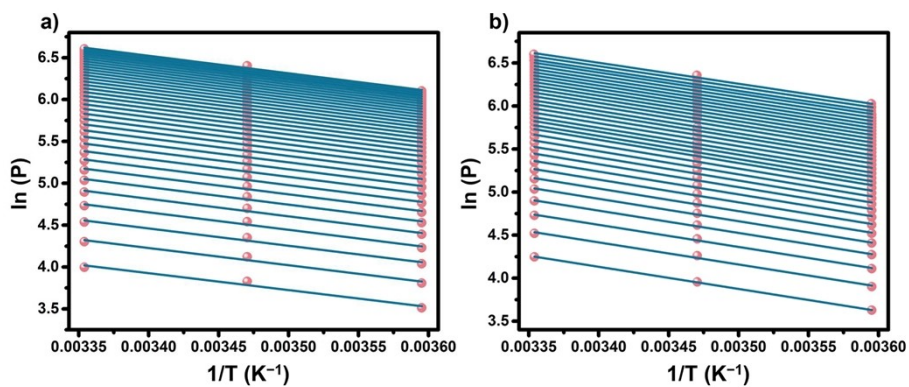

Fig. S14. The isotherms of  $Q_{st}$  values for a) **JLU-MOF116** and b) **JLU-MOF117**.



#### S4. CO<sub>2</sub> conversions with epoxides catalyzed by JLU-MOF116 and JLU-MOF117.

Table S3. Comparisons of volumetric densities of amide groups in JLU-MOF116, 117, and other amide-based MOF materials.

| Compound                                  | Volumetric density of amide group (mol L <sup>-1</sup> ) | Ref.      |
|-------------------------------------------|----------------------------------------------------------|-----------|
| 3W-ROD-1                                  | 2.5                                                      | 2         |
| sph-MOF-1                                 | 2.4                                                      | 3         |
| JLU-MOF117                                | 2.4                                                      | This work |
| M <sub>2</sub> (carboxylate) <sub>4</sub> | 2.1                                                      | 4         |
| JLU-MOF116                                | 1.6                                                      | This Work |
| DUT-32                                    | 0.9                                                      | 5         |

Table S4. The investigation of optimal conditions for CO<sub>2</sub> conversion by JLU-MOF116 and JLU-MOF117.

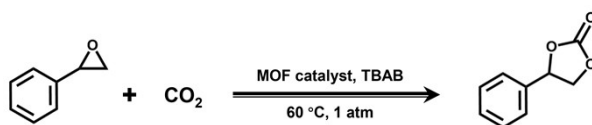

| Entry <sup>a</sup> | JLU-MOF116  |             |          |           | Entry <sup>a</sup> | JLU-MOF117  |             |          |           |
|--------------------|-------------|-------------|----------|-----------|--------------------|-------------|-------------|----------|-----------|
|                    | Cat. (mol%) | TBAB (mol%) | Time (h) | Yield (%) |                    | Cat. (mol%) | TBAB (mol%) | Time (h) | Yield (%) |
| 1                  | 0.075       | 5           | 8        | 59        | 14                 | 0.05        | 5           | 6        | 38        |
| 2                  | 0.15        | 5           | 8        | > 99      | 15                 | 0.1         | 5           | 6        | 94        |
| 3                  | 0.3         | 5           | 8        | > 99      | 16                 | 0.2         | 5           | 6        | 97        |
| 4                  | 0.15        | 2           | 8        | 95        | 17                 | 0.1         | 2           | 6        | 86        |
| 5                  | 0.15        | 8           | 8        | > 99      | 18                 | 0.1         | 8           | 6        | > 99      |
| 6                  | 0.15        | 5           | 1        | 51        | 19                 | 0.1         | 5           | 1        | 47        |
| 7                  | 0.15        | 5           | 2        | 69        | 20                 | 0.1         | 5           | 2        | 59        |
| 8                  | 0.15        | 5           | 3        | 91        | 21                 | 0.1         | 5           | 3        | 72        |
| 9                  | 0.15        | 5           | 4        | 96        | 22                 | 0.1         | 5           | 4        | 86        |
| 10                 | 0.15        | 5           | 5        | 97        | 23                 | 0.1         | 5           | 5        | 92        |
| 11                 | 0.15        | 5           | 6        | 99        | 24                 | 0.1         | 5           | 8        | 99        |
| 12                 | None        | 5           | 6        | 32        | 25                 | None        | 5           | 6        | 32        |
| 13 <sup>b</sup>    | 0.15        | 5           | 6        | 41        | 26 <sup>b</sup>    | 0.15        | 5           | 6        | 39        |

Reaction conditions: <sup>a</sup> Activated MOF catalysts, styrene oxide (10 mmol) and 1 atm CO<sub>2</sub> pressure.

<sup>b</sup> As-synthesized MOF catalysts.

In order to determine the optimal reaction condition, a sequence of **JLU-MOF116**-catalyzed CO<sub>2</sub> conversion reactions with styrene oxide was performed at 60 °C and 1 atm CO<sub>2</sub> pressure. The amount of MOF catalyst was first explored within a prolonged reaction time and an appropriate TBAB amount of 5 mol%. CO<sub>2</sub> conversion with styrene oxide catalyzed by 0.075 mol% **JLU-MOF116** resulted in only 59% yield while gained nearly 100% yields by 0.15 and 0.3 mol% catalysts (Table S4, Entry 1-3). Accordingly, the appropriate catalyst amount was determined as 0.15 mol%. As an efficient nucleophile, the amount of TBAB co-catalyst also has an impact on CO<sub>2</sub> conversion. The yield was 95% and 99%, when 2 mol% and 5 mol% TBAB engaged in the reaction, respectively (Table S4, Entry 4 and 11). Thereby, the amount of TBAB was determined as 5 mol%. The optimal catalyst amounts were investigated in the same manner to be 0.1 mol% **JLU-MOF117** and 5 mol% TBAB (Table S4, Entry 15-19), which is also easy for comparison with **JLU-MOF116**. The kinetic curves of the CO<sub>2</sub> conversion reactions by **JLU-MOF116** and **117** were further investigated. The CO<sub>2</sub> conversions have already gained 51% and 47% yields for **JLU-MOF116** and **117** within the initial 1 h, respectively, reached up to 97% and 94% yields within the next 4 hours for **JLU-MOF116** and 5 hours for **JLU-MOF117**, respectively, and achieved equilibriums thereafter (Table S4, Entry 6-11, 20-25).

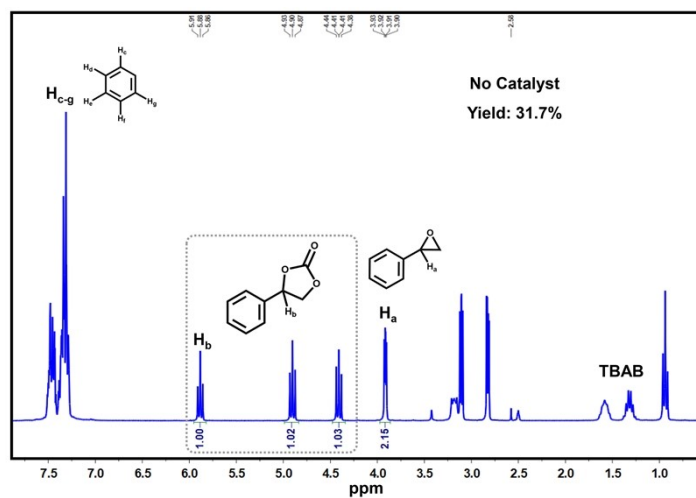

Fig. S15. <sup>1</sup>H NMR spectrum of CO<sub>2</sub> conversion with styrene oxide without MOF catalyst.

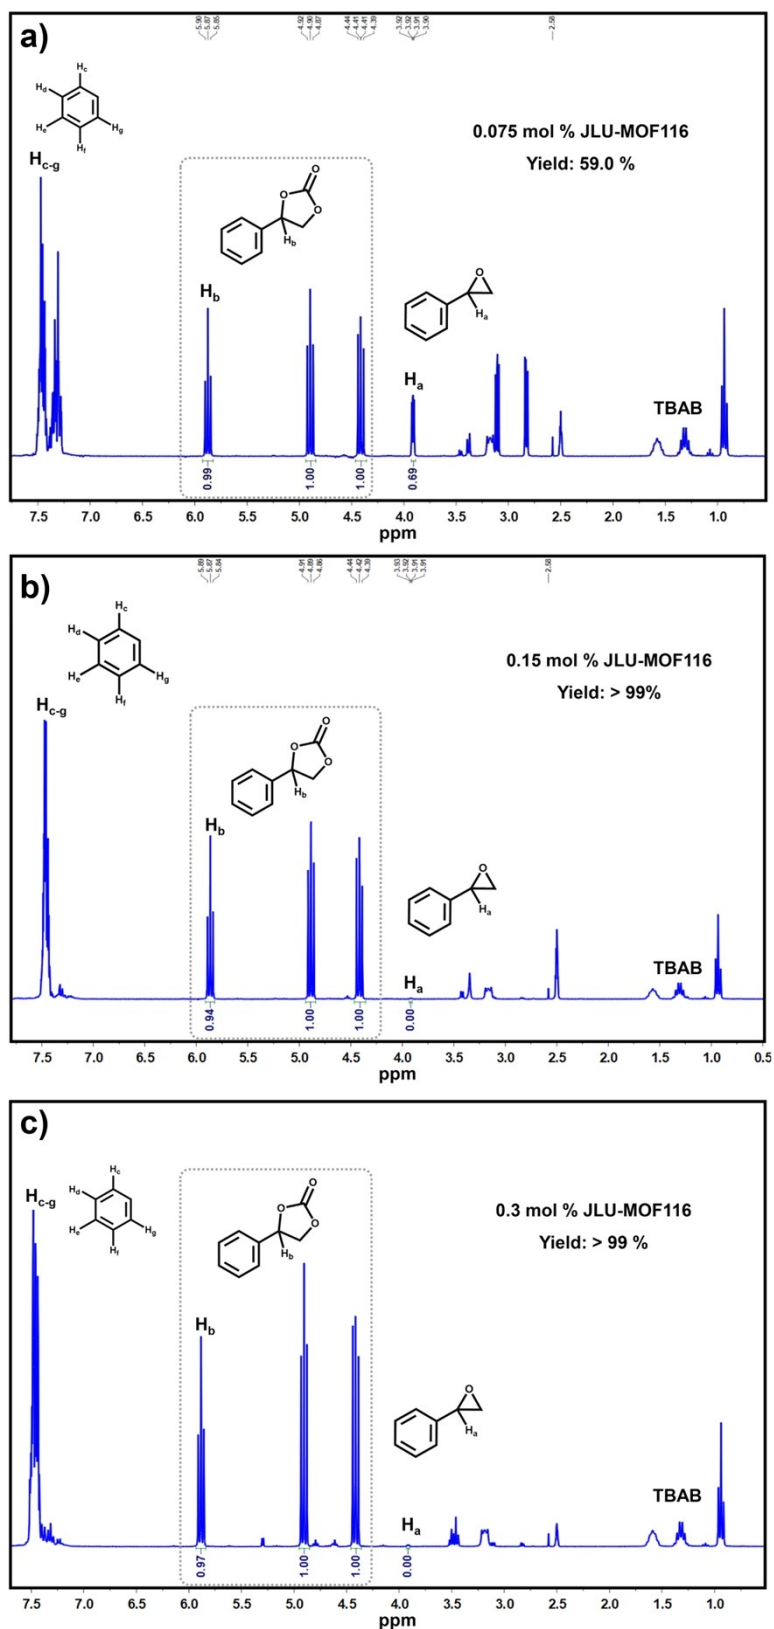

Fig. S16.  $^1\text{H}$  NMR spectra of  $\text{CO}_2$  conversion catalyzed by a) 0.075 mol%, b) 0.15 mol%, and c) 0.3 mol% JLU-MOF116.

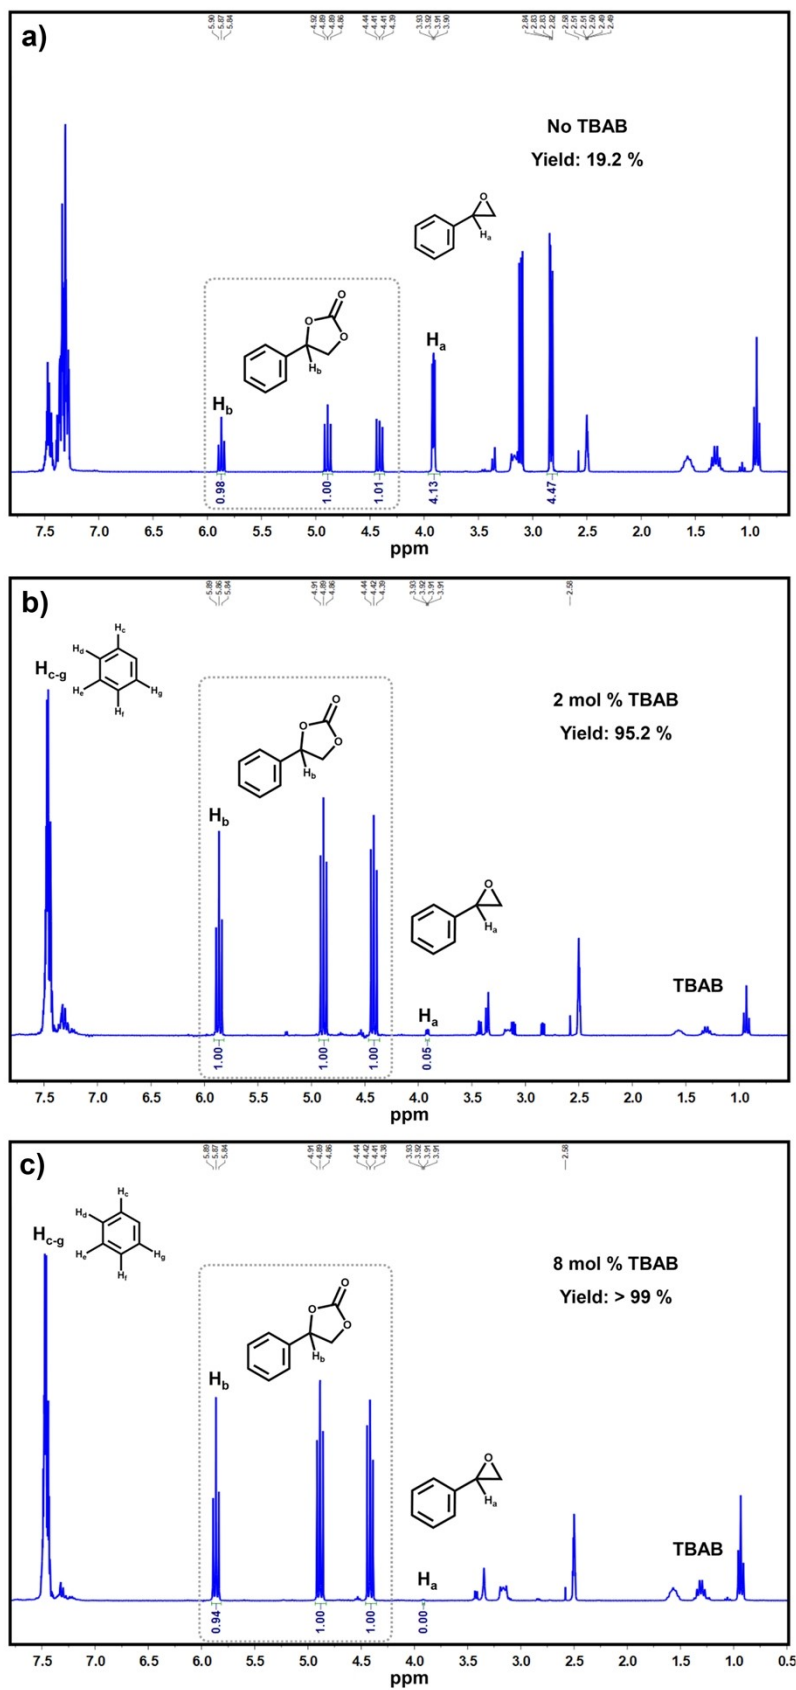

Fig. S17.  $^1\text{H}$  NMR spectra of  $\text{CO}_2$  conversion catalyzed by a) 0, b) 2 mol%, and c) 8 mol% TBAB and JLU-MOF116.

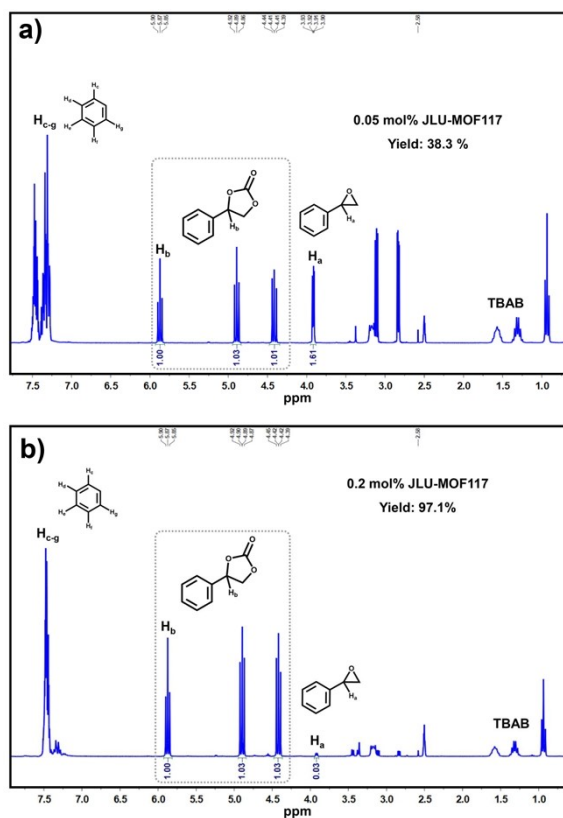

Fig. S18.  $^1\text{H}$  NMR spectra of  $\text{CO}_2$  conversion catalyzed by a) 0.05 mol% and b) 0.2 mol% **JLU-MOF117**.

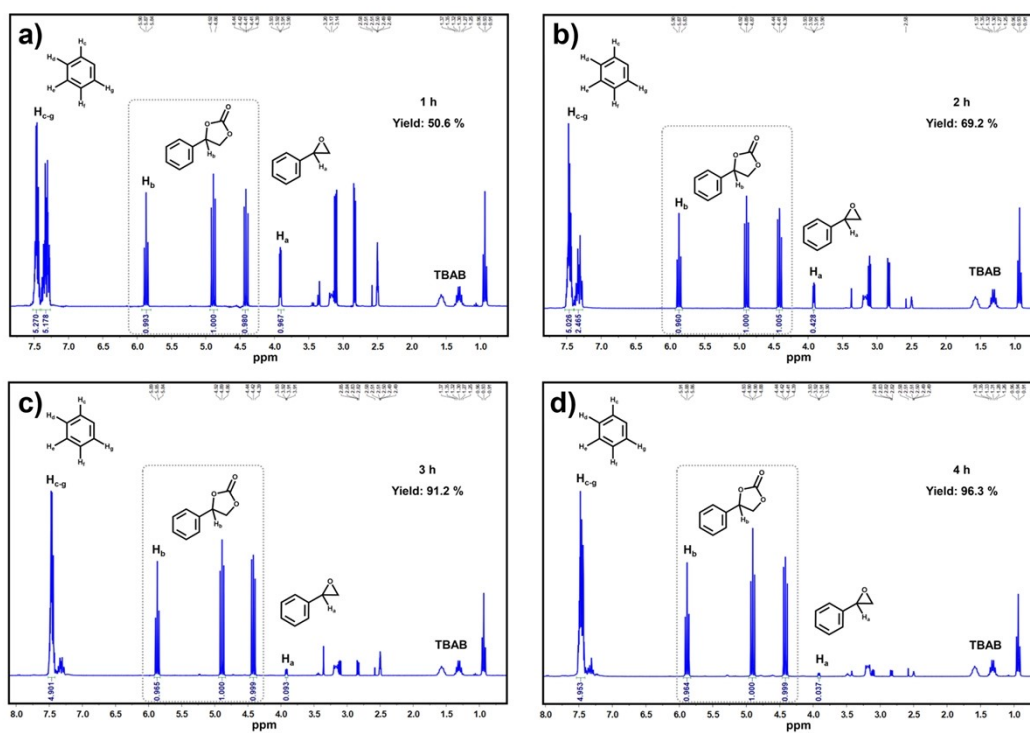

Fig. S19.  $^1\text{H}$  NMR spectra of  $\text{CO}_2$  conversion catalyzed by **JLU-MOF116** within a) 1 h, b) 2 h, c) 3 h, and d) 4 h.

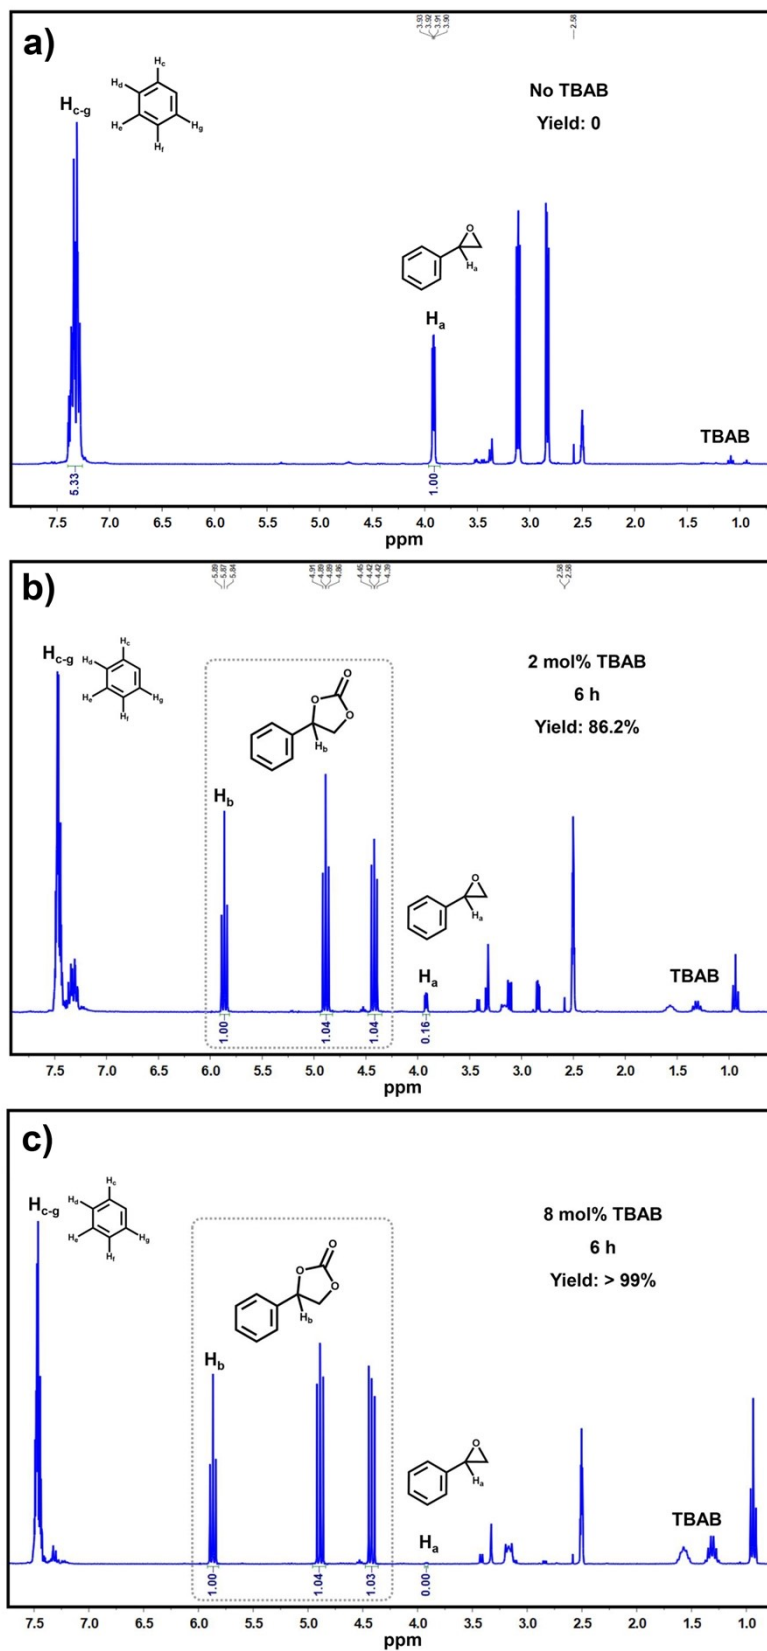

Fig. S20.  $^1\text{H}$  NMR spectra of  $\text{CO}_2$  conversion catalyzed by a) 0, b) 2 mol%, and c) 8 mol% TBAB and JLU-MOF117.

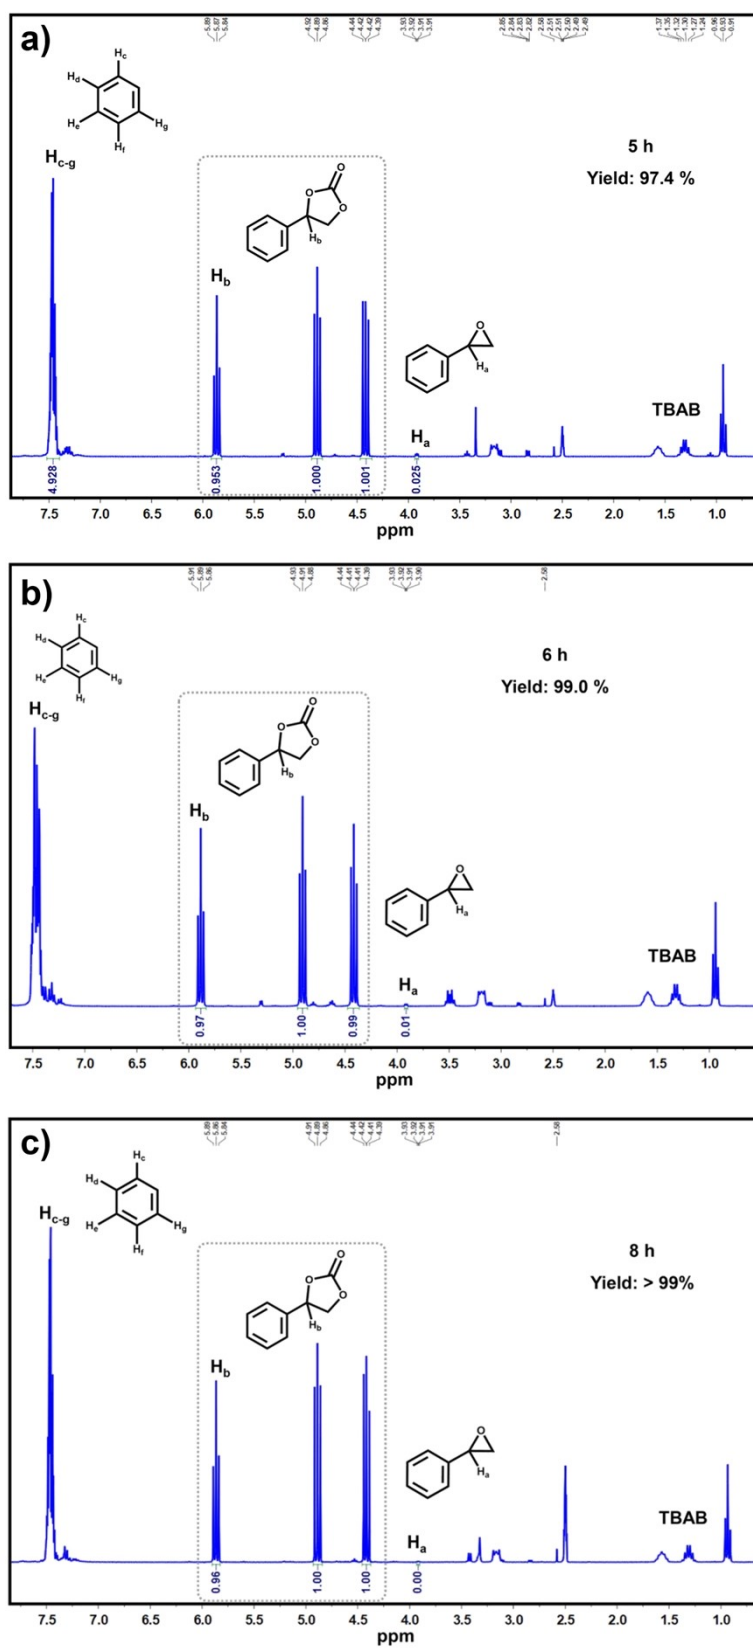

Fig. S21. <sup>1</sup>H NMR spectra of CO<sub>2</sub> conversion catalyzed by **JLU-MOF116** within a) 5 h, b) 6 h, and c) 8 h.

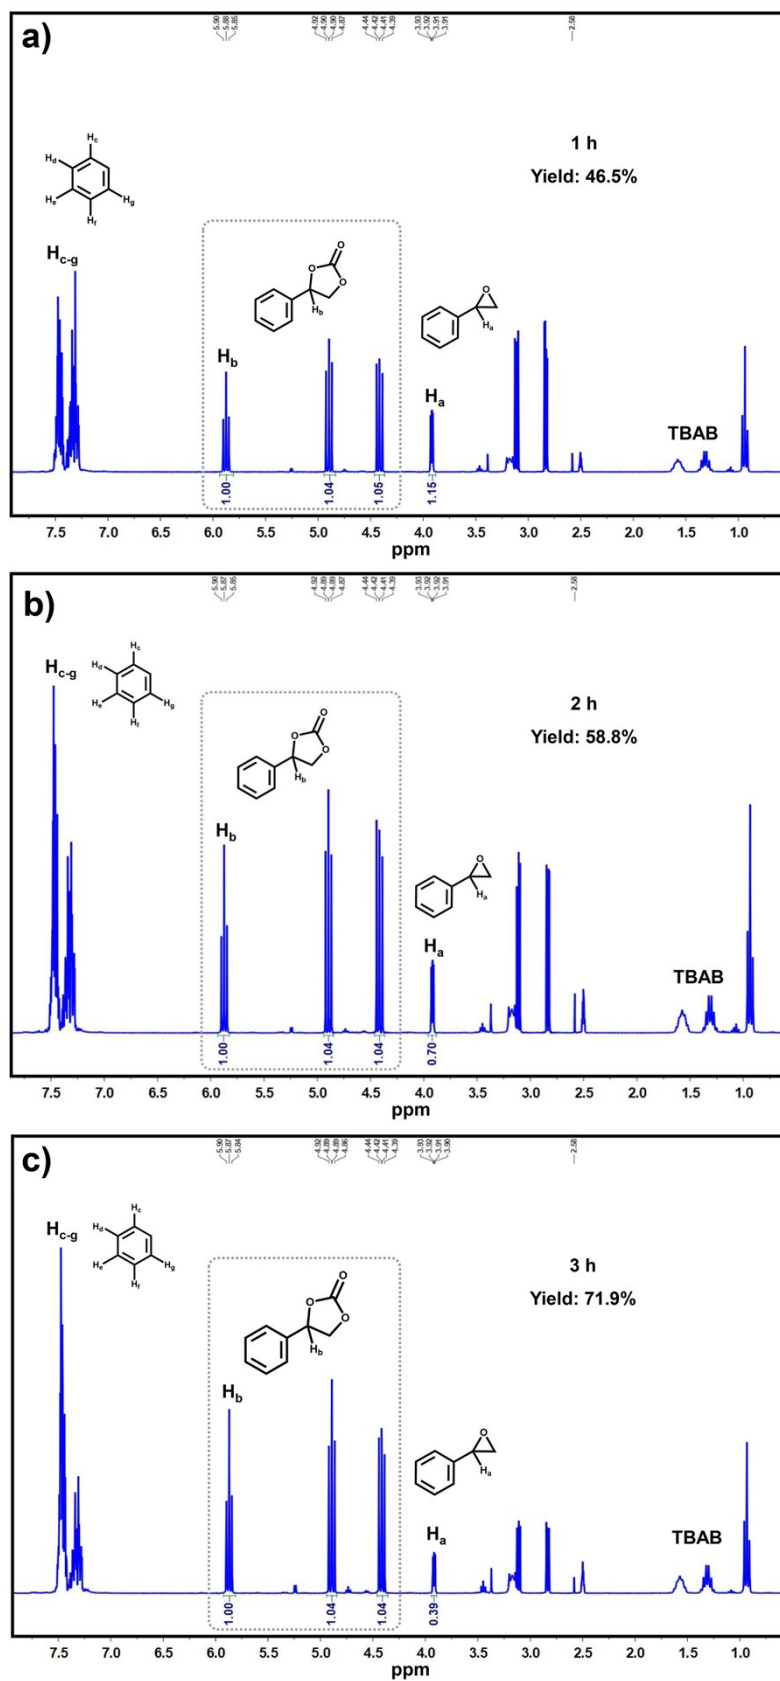

Fig. S22. <sup>1</sup>H NMR spectra of CO<sub>2</sub> conversion catalyzed by **JLU-MOF117** within a) 1 h, b) 2 h, and c) 3 h.



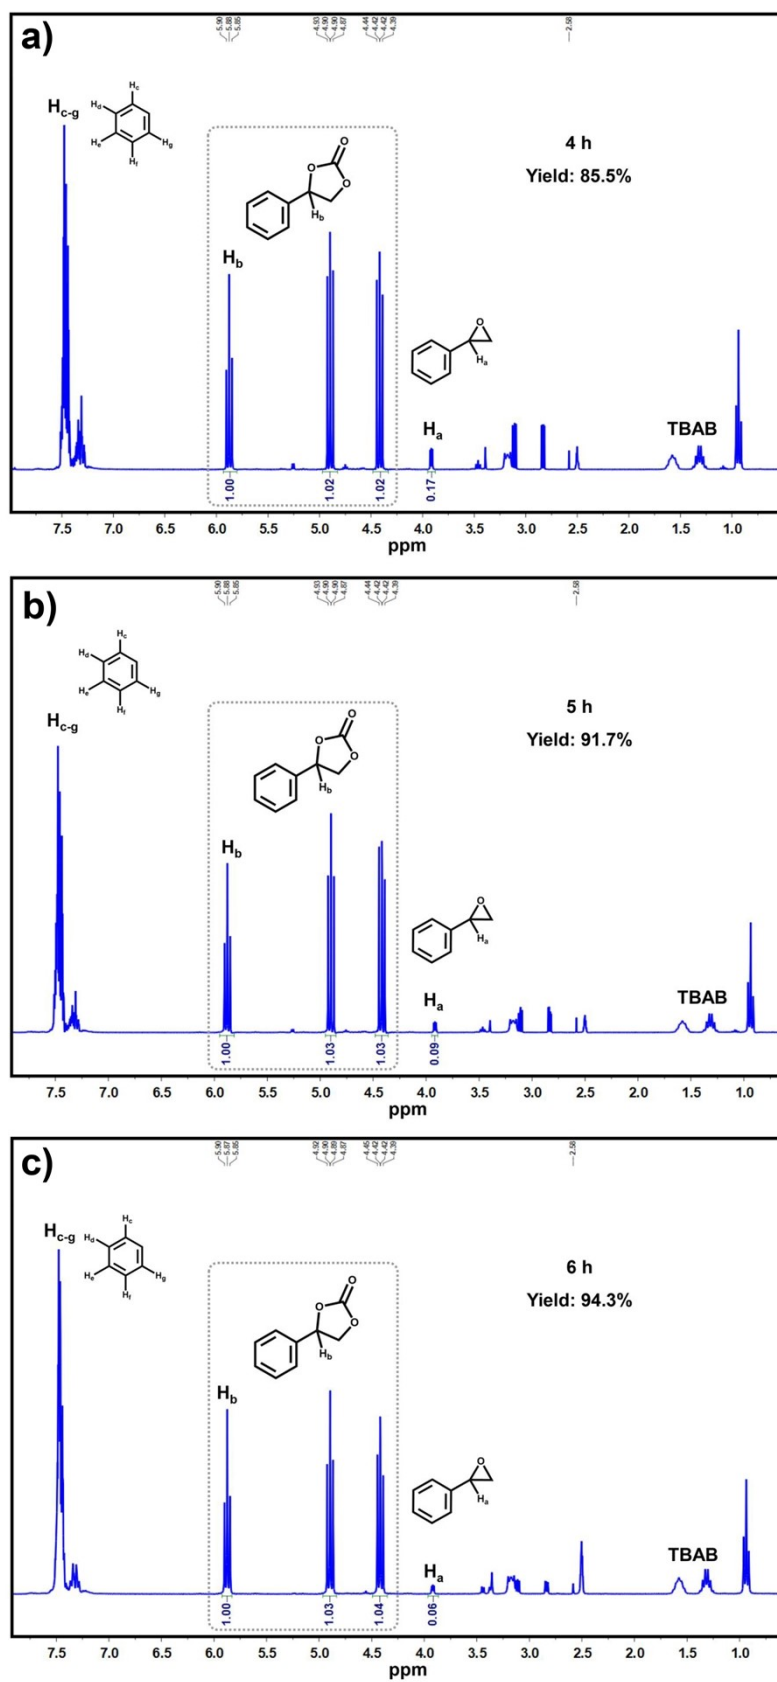

Fig. S23.  $^1\text{H}$  NMR spectra of  $\text{CO}_2$  conversion catalyzed by **JLU-MOF116** within a) 4 h, b) 5 h, and c) 6 h.

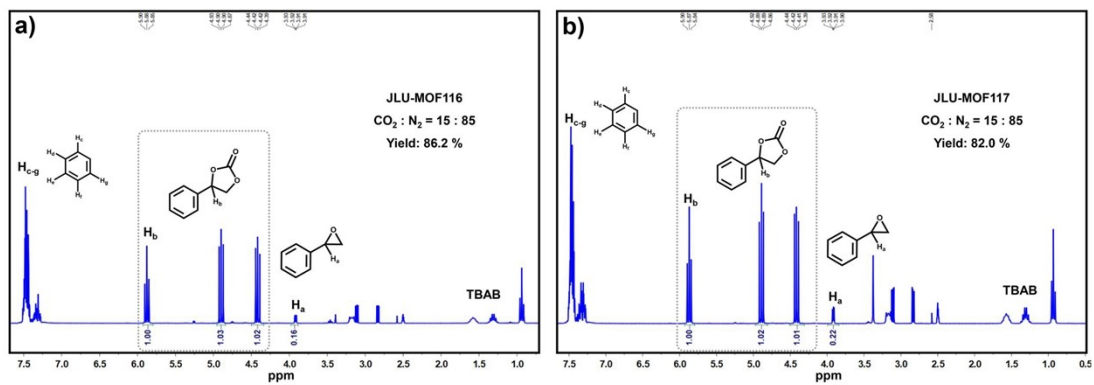

Fig. S24. CO<sub>2</sub> conversions by **JLU-MOF116** and **117** under 1 atm of CO<sub>2</sub> and N<sub>2</sub> mixed gases (CO<sub>2</sub>/N<sub>2</sub>, 15/85, v/v).

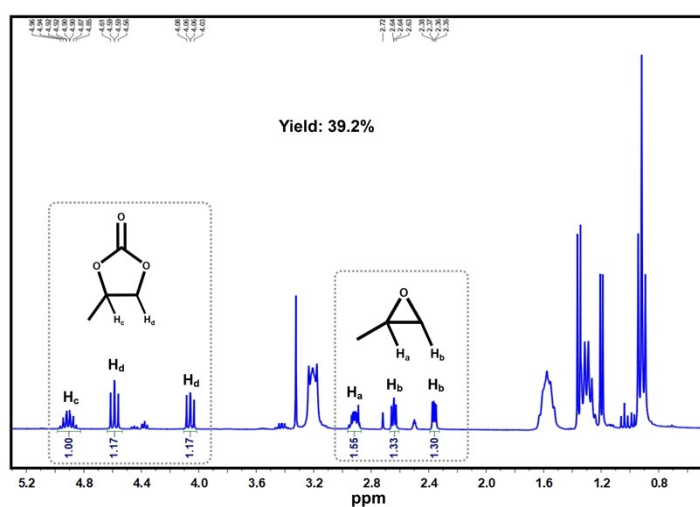

Fig. S25. <sup>1</sup>H NMR spectrum of CO<sub>2</sub> conversion with propylene oxide catalyzed by **JLU-MOF116**.

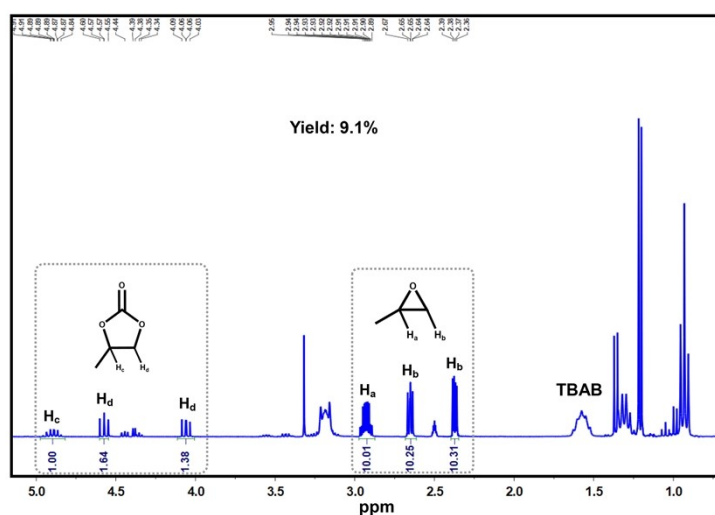

Fig. S26. <sup>1</sup>H NMR spectrum of CO<sub>2</sub> conversion with propylene oxide catalyzed by **JLU-MOF117**.

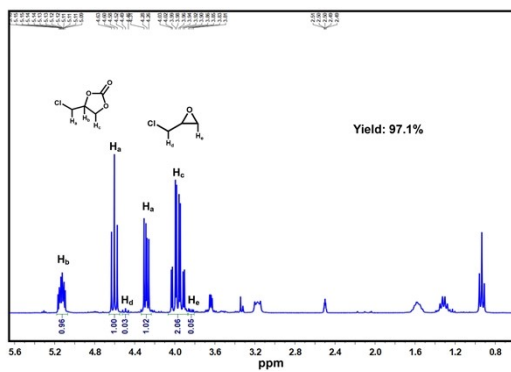

Fig. S27.  $^1\text{H}$  NMR spectrum of  $\text{CO}_2$  conversion with epoxy chloropropane catalyzed by **JLU-MOF116**.

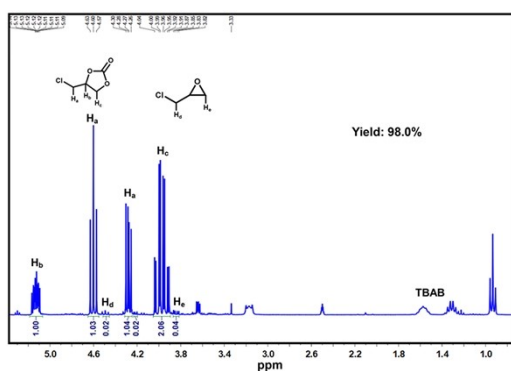

Fig. S28.  $^1\text{H}$  NMR spectrum of  $\text{CO}_2$  conversion with epoxy chloropropane catalyzed by **JLU-MOF117**.

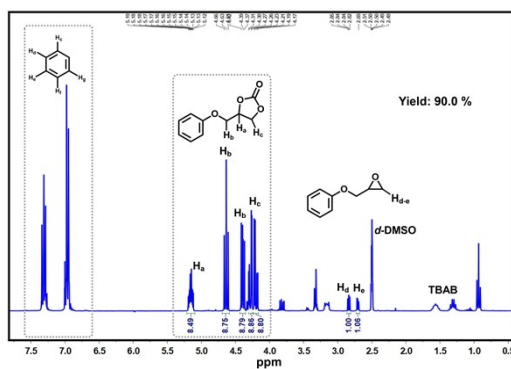

Fig. S29.  $^1\text{H}$  NMR spectrum of  $\text{CO}_2$  conversion with epoxypropyl phenyl ether catalyzed by **JLU-MOF116**.

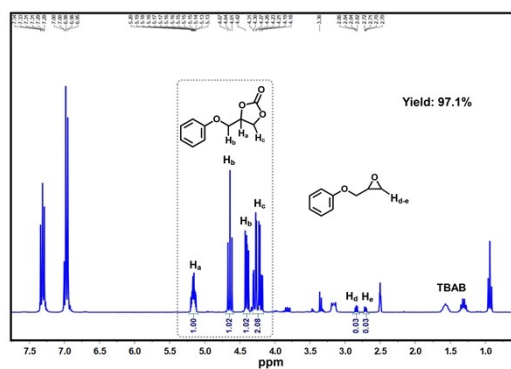

Fig. S30.  $^1\text{H}$  NMR spectrum of  $\text{CO}_2$  conversion with epoxypropyl phenyl ether catalyzed by **JLU-MOF117**.

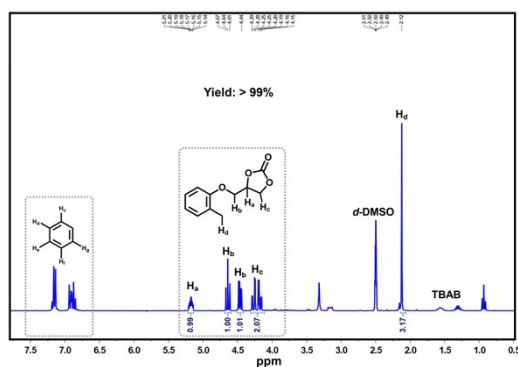

Fig. S31.  $^1\text{H}$  NMR spectrum of  $\text{CO}_2$  conversion with o-tolyl glycidyl ether catalyzed by **JLU-MOF116**.

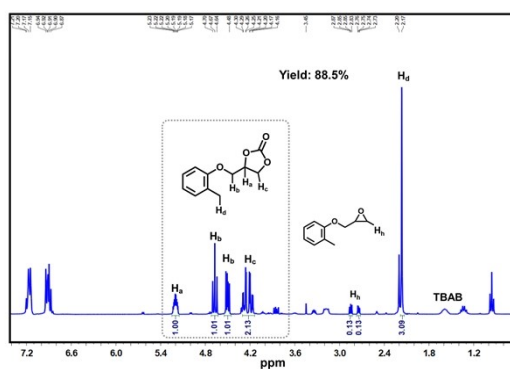

Fig. S32.  $^1\text{H}$  NMR spectrum of  $\text{CO}_2$  conversion with o-tolyl glycidyl ether catalyzed by **JLU-MOF117**.

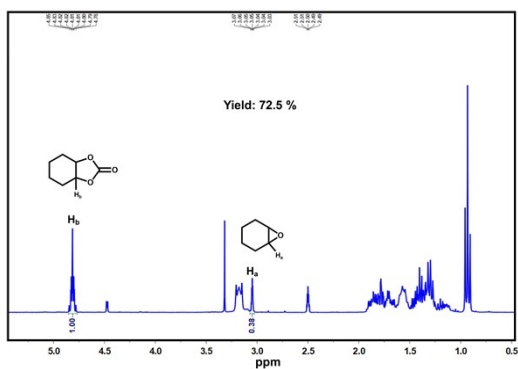

Fig. S33.  $^1\text{H}$  NMR spectrum of  $\text{CO}_2$  conversion with cyclohexene oxide catalyzed by **JLU-MOF116**.

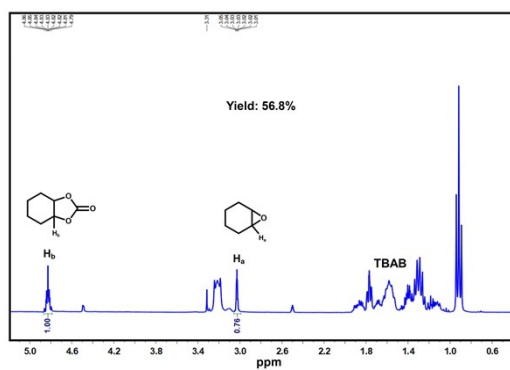

Fig. S34.  $^1\text{H}$  NMR spectrum of  $\text{CO}_2$  conversion with cyclohexene oxide catalyzed by **JLU-MOF117**.

Table S5. CO<sub>2</sub> cycloaddition catalytic efficiencies of **JLU-MOF116** and **117** in comparison with other MOF materials.

| Substrate | Compound <sup>a</sup>                                                                | Time (h)      | Yield (%) | TON | TOF (h <sup>-1</sup> ) | Ref.      |
|-----------|--------------------------------------------------------------------------------------|---------------|-----------|-----|------------------------|-----------|
| SO        | Ce <sub>2</sub> NDC <sub>3</sub>                                                     | 8             | 89        | 360 | 45.0                   | 6         |
|           | MOF1                                                                                 | 24            | 11        | 65  | 15.9                   | 7         |
|           | Hf-NU-1000                                                                           | 56            | 100       | 400 | 7.1                    | 8         |
|           | In <sub>2</sub> (OH)(btc)(Hbtc) <sub>0.4</sub> (L) <sub>0.6</sub> ·3H <sub>2</sub> O | 48            | 32        | 139 | 2.9                    | 9         |
|           | {[Ba <sub>2</sub> (BDPO)(H <sub>2</sub> O)]·DMA} <sub>n</sub>                        | 48            | 19.8      | 105 | 2.2                    | 10        |
|           | {[Sr(BDPO) <sub>0.5</sub> (H <sub>2</sub> O)]·2H <sub>2</sub> O} <sub>n</sub>        | 48            | 18        | 21  | 0.4                    | 11        |
|           | <b>JLU-MOF117</b> <sup>b</sup>                                                       | 6             | 94        | 940 | 156.7                  | This Work |
|           | <b>JLU-MOF116</b> <sup>b</sup>                                                       | 5             | 97        | 647 | 129.4                  | This Work |
| ECH       | Ce <sub>2</sub> NDC <sub>3</sub>                                                     | 8             | 92        | 372 | 46.5                   | 6         |
|           | MOF1                                                                                 | 24            | 99        | 582 | 24.3                   | 7         |
|           | FJI-H7(Cu)                                                                           | 60            | 67        | 333 | 5.5                    | 12        |
|           | {[Ba <sub>2</sub> (BDPO)(H <sub>2</sub> O)]·DMA} <sub>n</sub>                        | 48            | 90        | 180 | 3.8                    | 10        |
|           | [Cu(bpy) <sub>2</sub> (EDS)] <sub>n</sub>                                            | Not Mentioned | 92        | 92  |                        | 13        |
|           | <b>JLU-MOF117</b> <sup>b</sup>                                                       | 6             | 98        | 980 | 163.3                  | This Work |
|           | <b>JLU-MOF116</b> <sup>b</sup>                                                       | 5             | 97        | 647 | 129.4                  | This Work |

<sup>a</sup> Room temperature, 1 bar CO<sub>2</sub> pressure; <sup>b</sup> 60 °C, 1 bar CO<sub>2</sub> pressure.

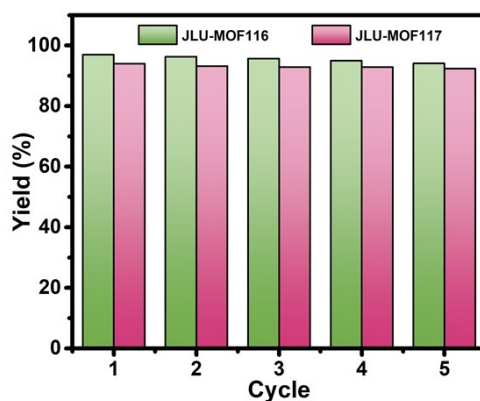

Fig. S35. The catalytic efficiencies of **JLU-MOF116** and **117** for CO<sub>2</sub> conversion within five cycles.

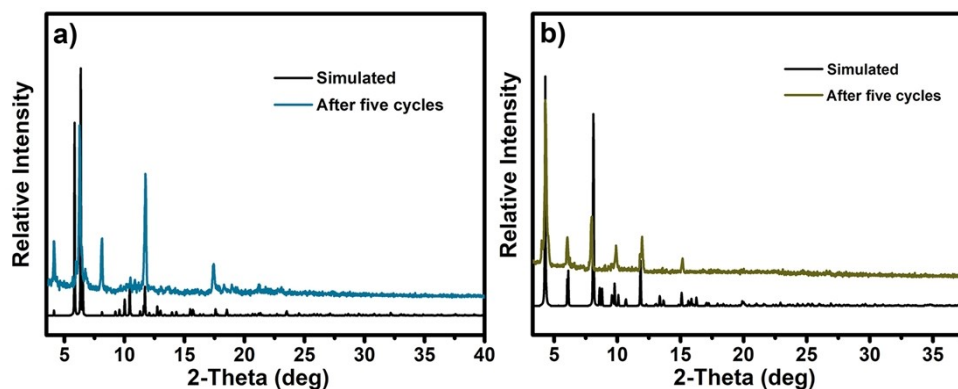

Fig. S36. PXRD patterns of a) **JLU-MOF116** and b) **JLU-MOF117** after five cycles of cycloadditions of styrene oxide with CO<sub>2</sub>.

### S5. Knoevenagel condensation reactions catalyzed by JLU-MOF116 and JLU-MOF117.

Table S6. The investigation of optimal reaction conditions of Knoevenagel condensation for **JLU-MOF116** and **JLU-MOF117**.

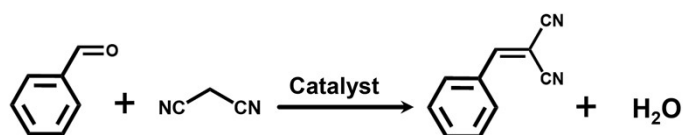

| Entry | JLU-MOF116  |            |            |           | Entry | JLU-MOF117  |            |            |           |
|-------|-------------|------------|------------|-----------|-------|-------------|------------|------------|-----------|
|       | Cat. (mol%) | Temp. (°C) | Time (min) | Yield (%) |       | Cat. (mol%) | Temp. (°C) | Time (min) | Yield (%) |
| 1     | 0.125       | 40         | 180        | 89        | 13    | 0.25        | 40         | 120        | 99        |
| 2     | 0.250       | 40         | 180        | 98        |       |             |            |            |           |
| 3     | 0.500       | 40         | 180        | 98        | 14    | 0.50        | 40         | 120        | > 99      |
| 4     | 0.250       | 20         | 180        | 90        | 15    | 0.25        | 20         | 120        | 96        |
| 5     | 0.250       | 60         | 180        | 96        |       |             |            |            |           |
| 6     | 0.250       | 40         | 30         | 60        | 16    | 0.25        | 40         | 30         | 89        |
| 7     | 0.250       | 40         | 60         | 81        | 17    | 0.25        | 40         | 60         | 94        |
| 8     | 0.250       | 40         | 90         | 93        |       |             |            |            |           |
| 9     | 0.250       | 40         | 120        | 95        | 18    | 0.25        | 40         | 90         | 99        |
| 10    | 0.250       | 40         | 150        | 97        | 19    | L2          | 40         | 90         | 24        |
| 11    | L1          | 40         | 120        | 3         |       |             |            |            |           |
| 12    | None        | 40         | 120        | 30        | 20    | None        | 40         | 90         | 21        |

Reaction conditions: Benzaldehyde (2 mmol), malononitrile (3 mmol), EtOH (4 mL).

Malononitrile (3 mmol) and benzaldehyde (2 mmol) were chosen as substrates to investigate optimal conditions. The amount of MOF catalysts was investigated initially. The reactions catalyzed by 0.25 mol% and 0.5 mol% **JLU-MOF116** resulted in a 98% yield, while the reduction of **JLU-MOF116** to 0.125 mol% led to a negligible decline to an 89% yield (Table S6, Entry 1-3). Thereby, the amount of **JLU-MOF116** was determined as 0.25 mol%. **JLU-MOF117** was also determined as 0.25 mol% with a 99% yield for ease of comparison. The optimal reaction time and temperature were determined by time-varying kinetic curves under different temperatures to be 120 min/40 °C for **JLU-MOF116** and 90 min/40 °C for **JLU-MOF117**, respectively (Table S6, Entry 6-10 and 16-18, and Figure S42).

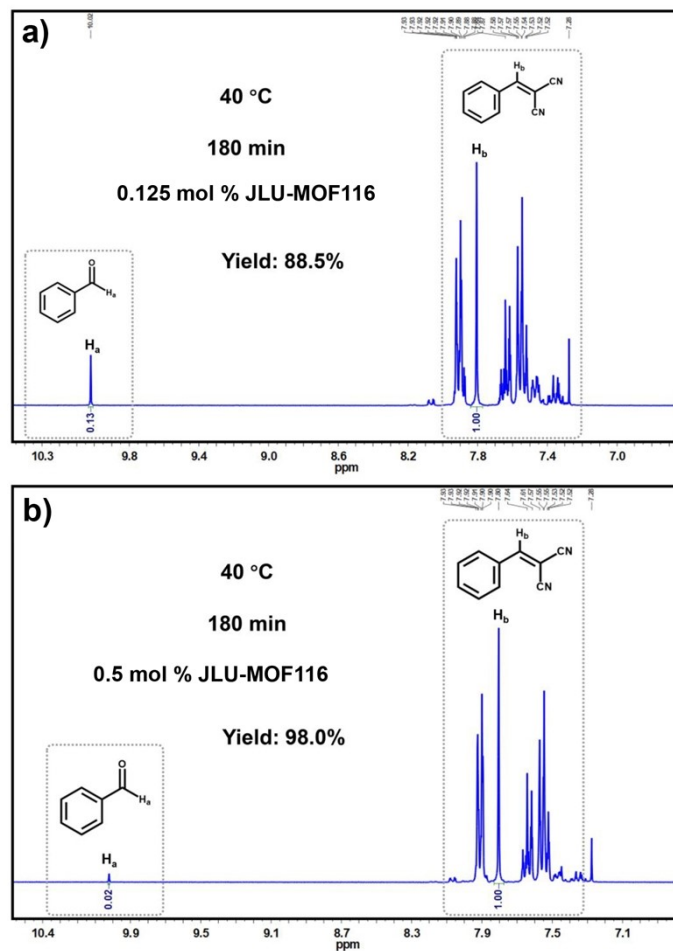

Fig. S37.  $^1\text{H}$  NMR spectra of Knoevenagel condensation reactions catalyzed by a) 0.125 mol% and b) 0.5 mol% **JLU-MOF116**.

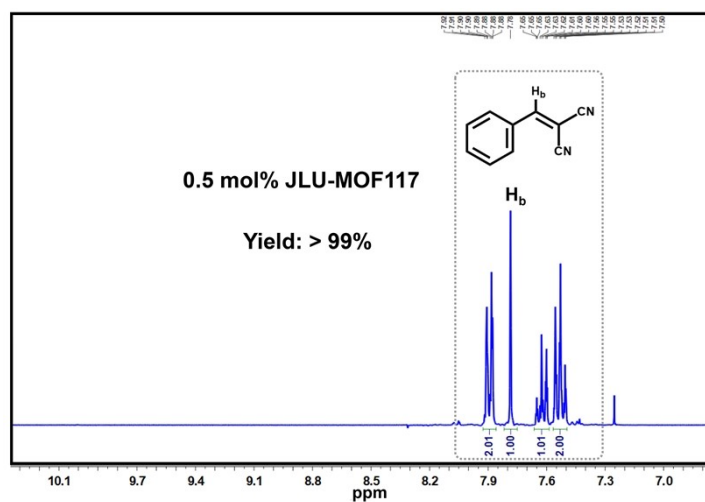

Fig. S38.  $^1\text{H}$  NMR spectra of Knoevenagel condensation reactions catalyzed by 0.5 mol% **JLU-MOF117**.

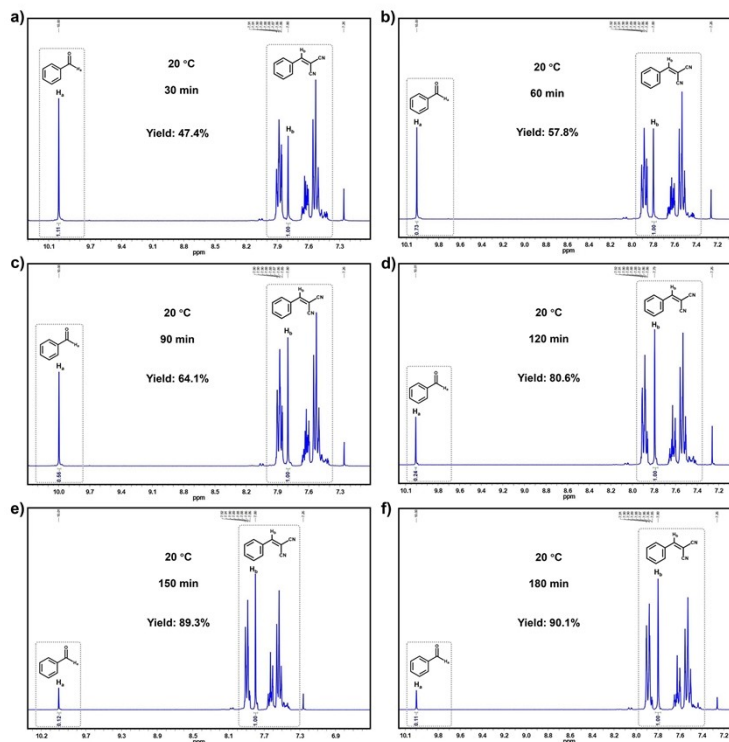

Fig. S39.  $^1\text{H}$  NMR of Knoevenagel condensation reactions catalyzed by **JLU-MOF116** at 20 °C within a) 30, b) 60, c) 90, d) 120, e) 150, and f) 180 min.

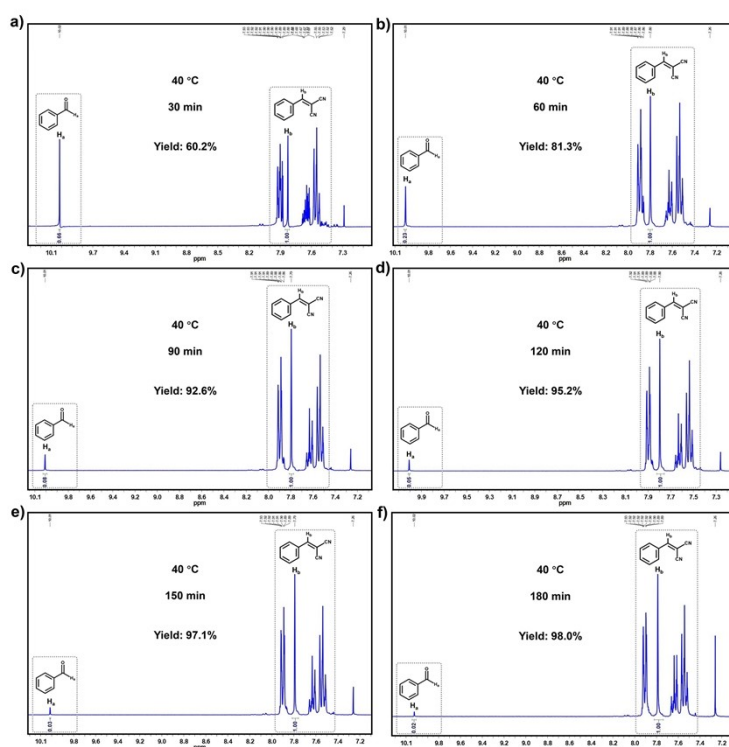

Fig. S40.  $^1\text{H}$  NMR of Knoevenagel condensation reactions catalyzed by **JLU-MOF116** at 40 °C within a) 30, b) 60, c) 90, d) 120, e) 150, and f) 180 min.



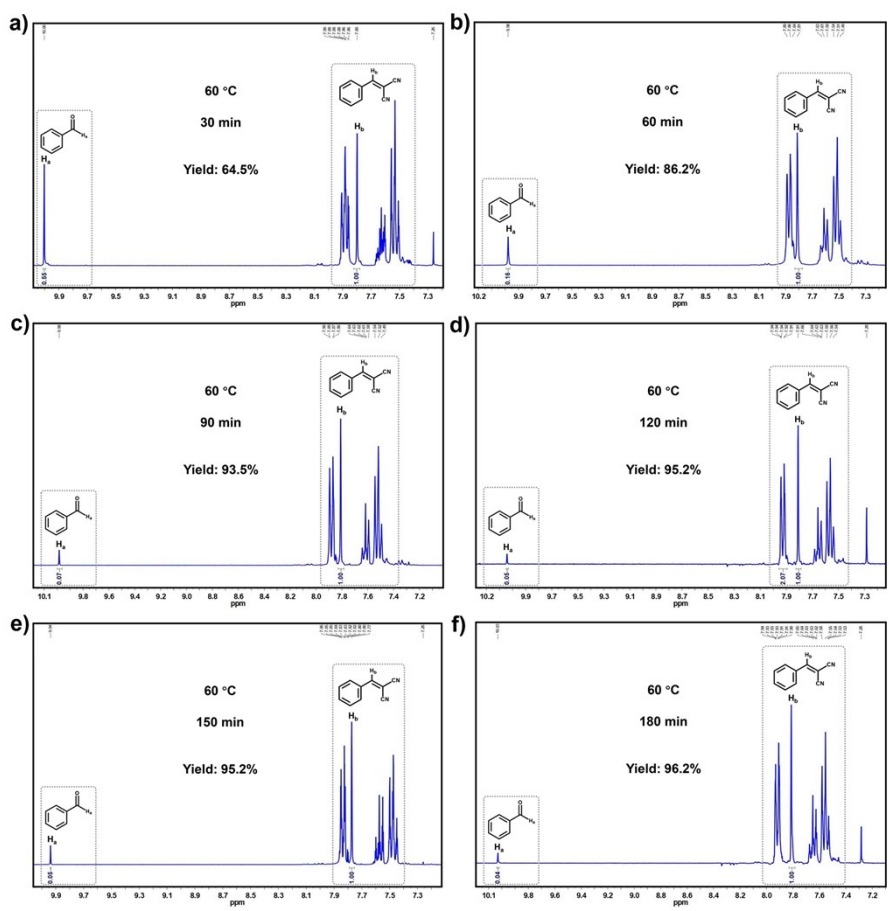

Fig. S41.  $^1\text{H}$  NMR of Knoevenagel condensation reactions catalyzed by **JLU-MOF116** at  $60\text{ }^\circ\text{C}$  within a) 30, b) 60, c) 90, d) 120, e) 150, and f) 180 min.

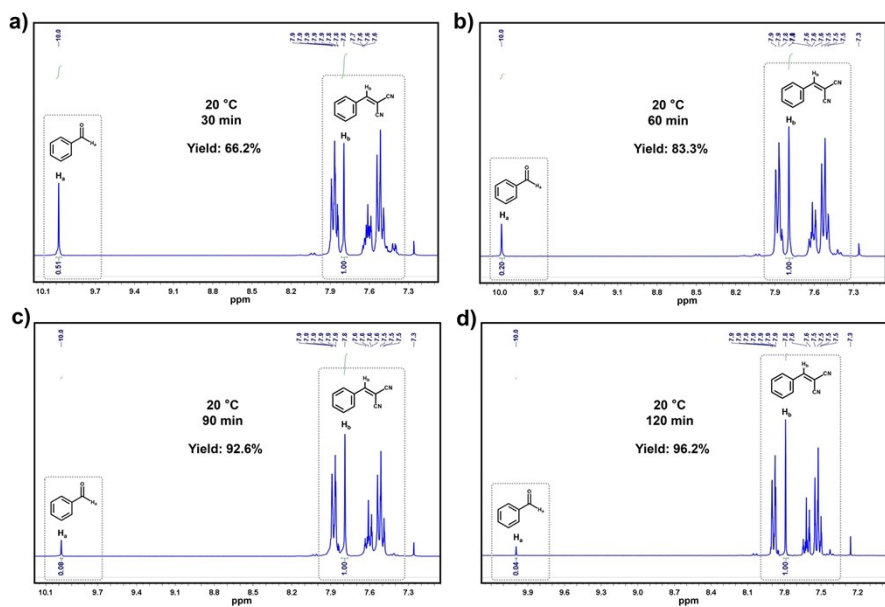

Fig. S42.  $^1\text{H}$  NMR of Knoevenagel condensation reactions catalyzed by **JLU-MOF117** at  $20\text{ }^\circ\text{C}$  within a) 30, b) 60, c) 90, and d) 120 min.

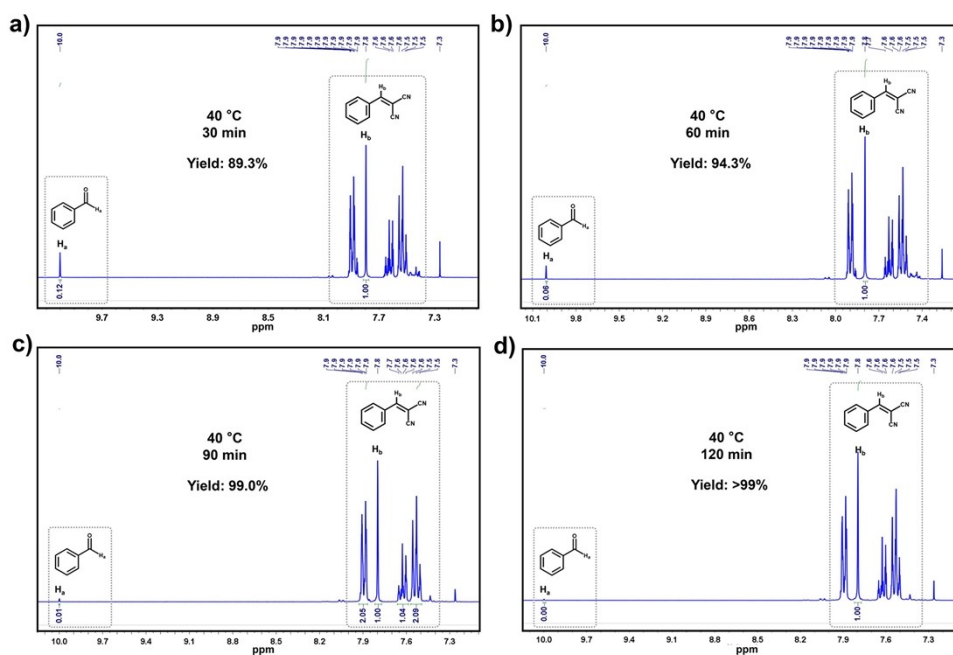

Fig. S43.  $^1\text{H}$  NMR of Knoevenagel condensation reactions catalyzed by **JLU-MOF117** at  $40\text{ }^\circ\text{C}$  within a) 30, b) 60, c) 90, and d) 120 min.

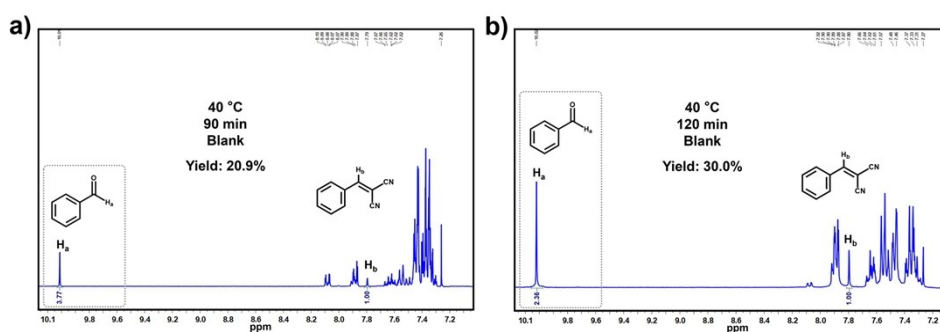

Fig. S44. Knoevenagel condensation reactions without catalyst within a) 90 min and b) 120 min.

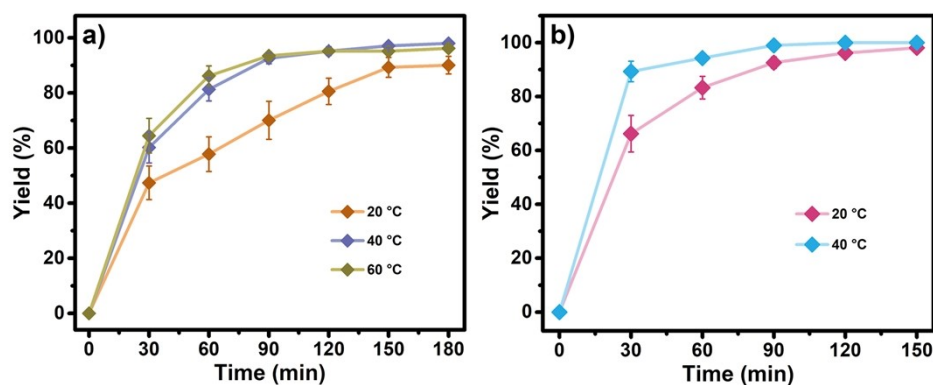

Fig. S45. Time-varying kinetic curves of a) **JLU-MOF116** and b) **JLU-MOF117** for Knoevenagel condensation.

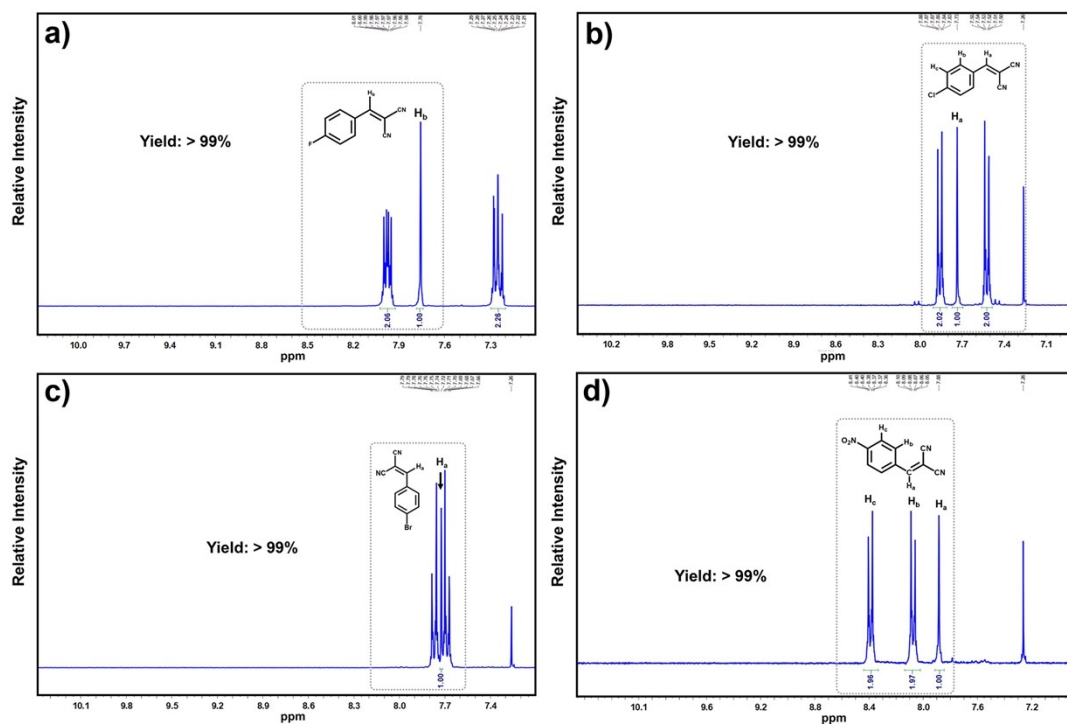

Fig. S46.  $^1\text{H}$  NMR spectra of the Knoevenagel condensation by **JLU-MOF116** with a) 4-fluorobenzaldehyde, b) 4-chlorobenzaldehyde, c) 4-bromobenzaldehyde, and d) 4-nitrobenzaldehyde as reactants.

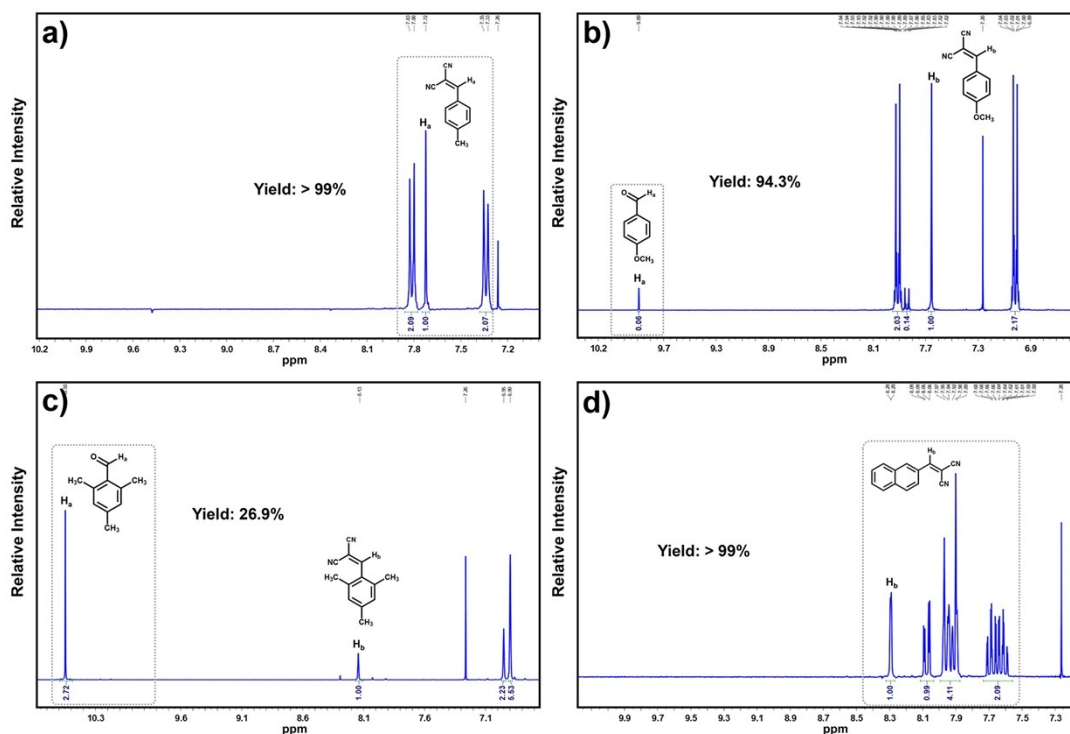

Fig. S47.  $^1\text{H}$  NMR spectra of the Knoevenagel condensation by **JLU-MOF116** with a) 4-methylbenzaldehyde, b) 4-anisaldehyde, c) 2,4,6-trimethylbenzaldehyde, and d) 2-naphthaldehyde as reactants.

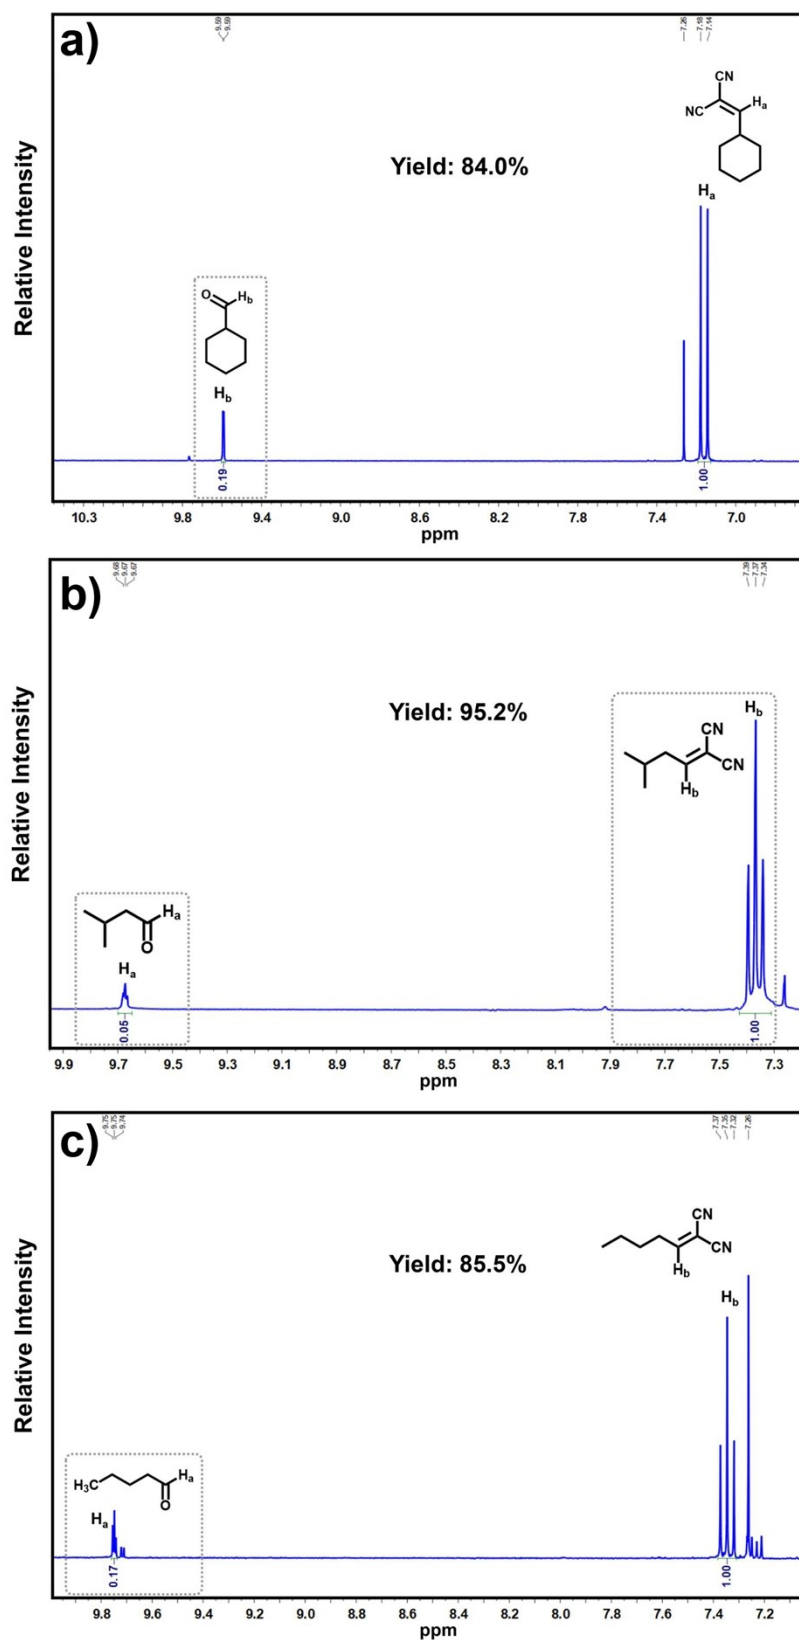

Fig. S48.  $^1\text{H}$  NMR spectra of the Knoevenagel condensation by **JLU-MOF116** with a) cyclohexanecarboxaldehyde, b) pentanal, and c) isovaleraldehyde as reactants.

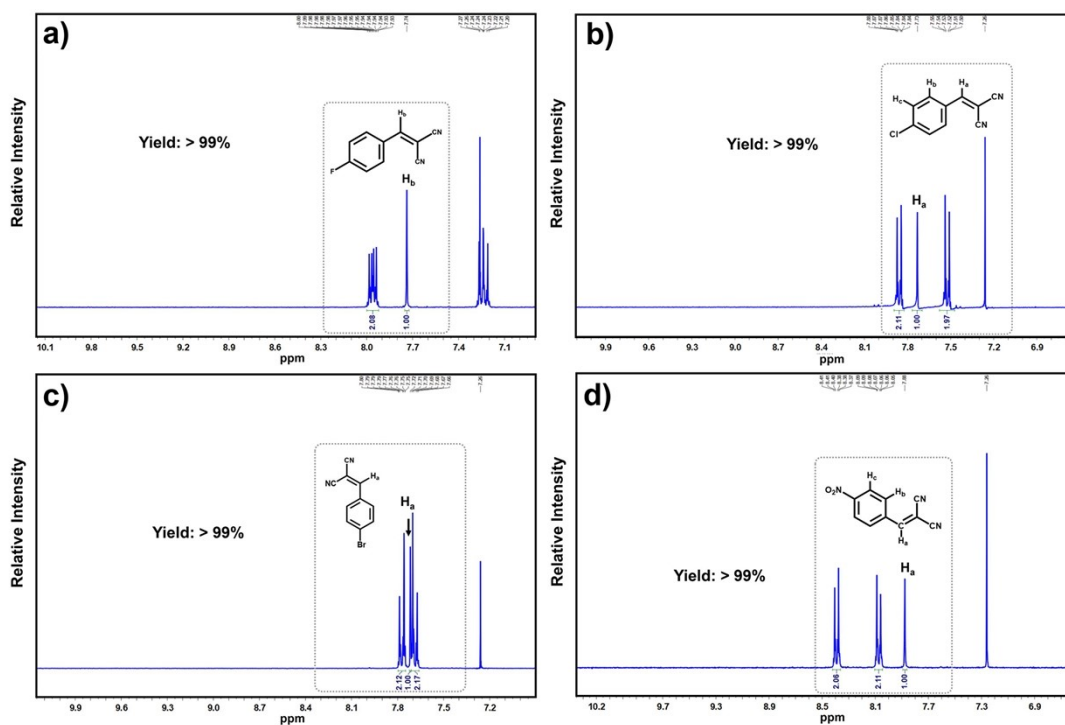

Fig. S49.  $^1\text{H}$  NMR spectra of the Knoevenagel condensation by **JLU-MOF117** with a) 4-fluorobenzaldehyde, b) 4-chlorobenzaldehyde, c) 4-bromobenzaldehyde, and d) 4-nitrobenzaldehyde as reactants.

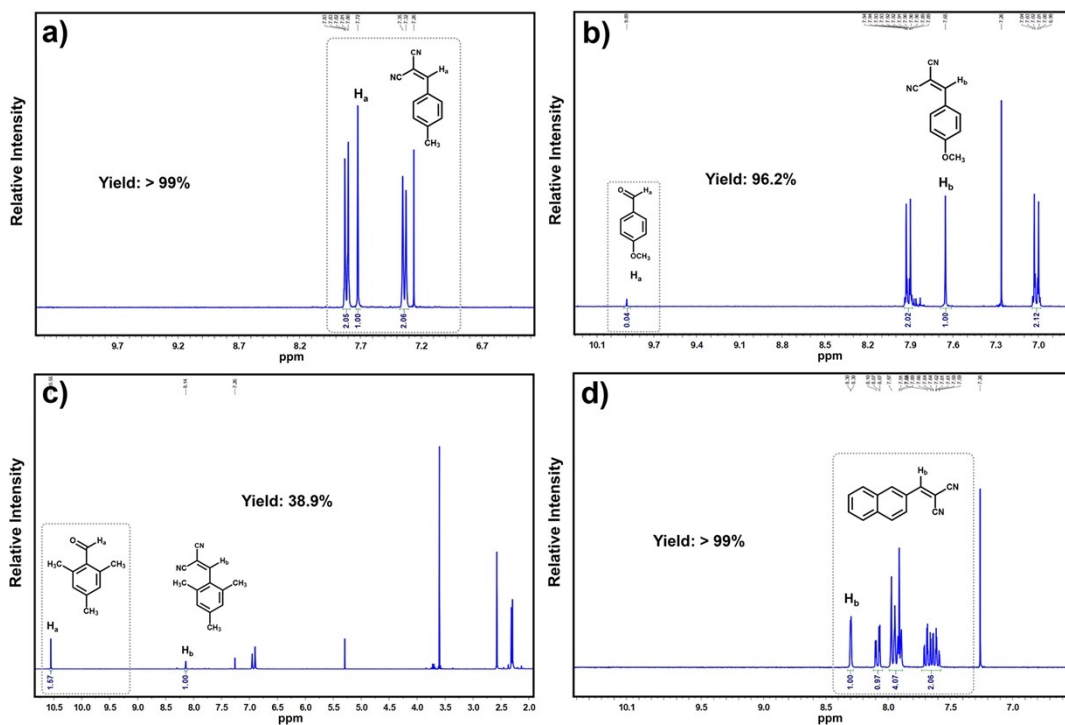

Fig. S50.  $^1\text{H}$  NMR spectra of the Knoevenagel condensation by **JLU-MOF117** with a) 4-methylbenzaldehyde, b) 4-anisaldehyde, c) 2,4,6-trimethylbenzaldehyde, and d) 2-naphthaldehyde as reactants.

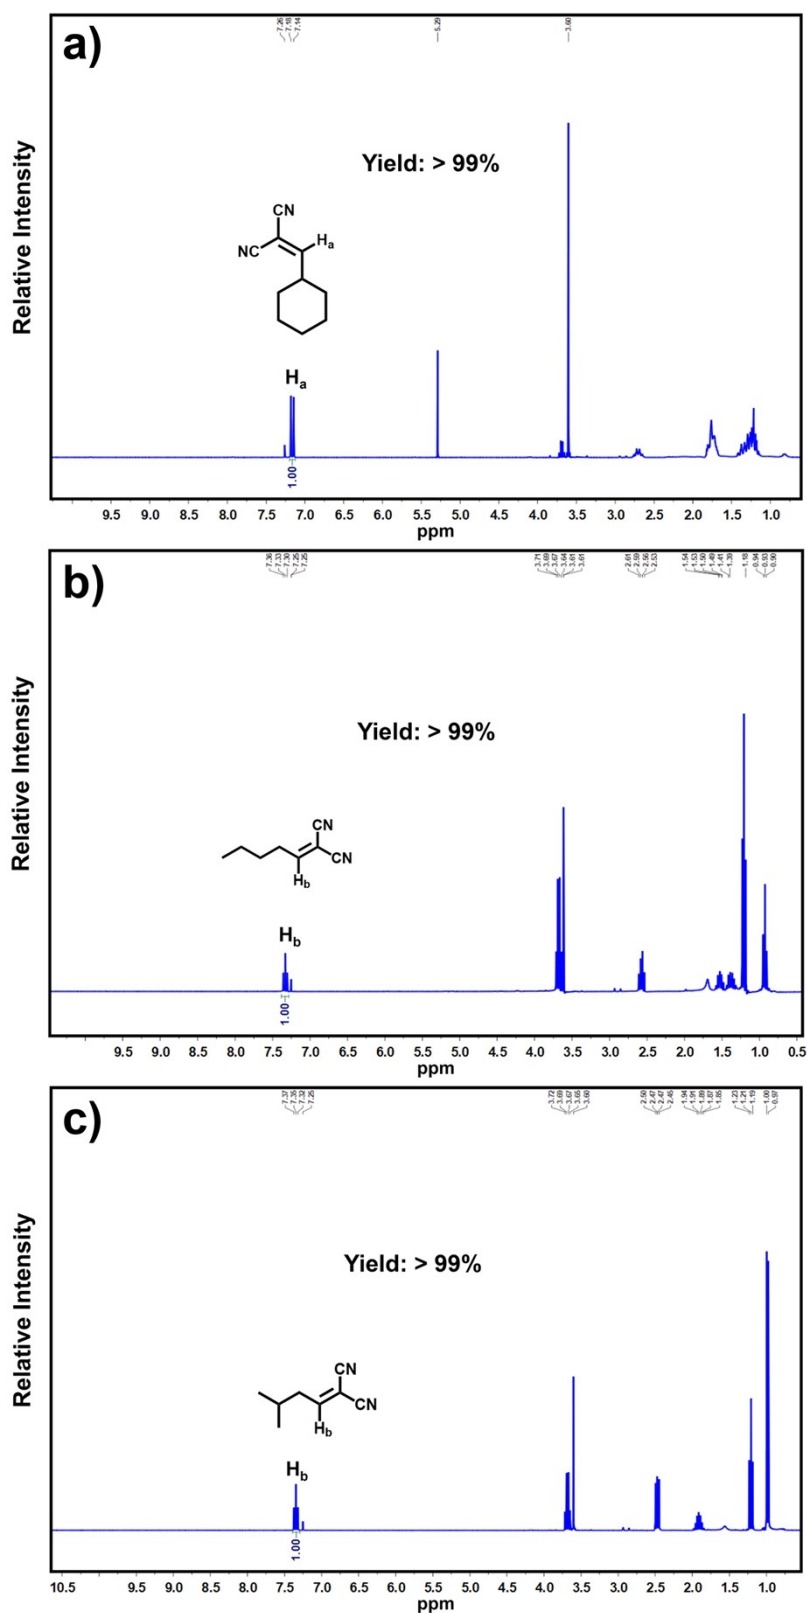

Fig. S51.  $^1\text{H}$  NMR spectra of the Knoevenagel condensation by **JLU-MOF117** with a) cyclohexanecarboxaldehyde, b) pentanal, and c) isovaleraldehyde as reactants.

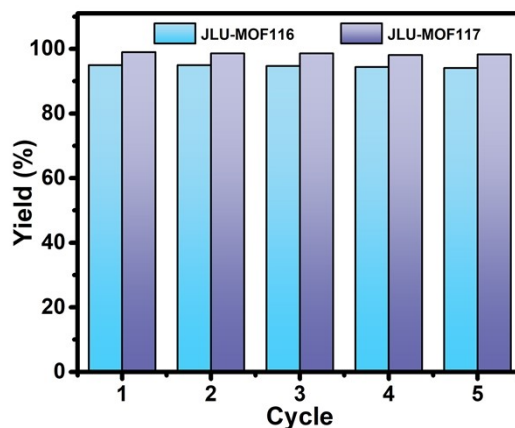

Fig. S52. The catalytic performances of **JLU-MOF116** and **117** for Knoevenagel condensation within five cycles.

Table S7. Knoevenagel condensation catalytic efficiencies of **JLU-MOF116** and **117** in comparison with other MOF materials.

| Compound                                                                                  | Cat. (mol%) | Solvent          | Temp. (°C) & Time (h) | Yield (%) | TON  | TOF (min <sup>-1</sup> ) | Ref.      |
|-------------------------------------------------------------------------------------------|-------------|------------------|-----------------------|-----------|------|--------------------------|-----------|
| <b>JLU-MOF117</b>                                                                         | 0.25        | Ethanol          | 40 °C/1.5 h           | 99        | 396  | 4.40                     | This work |
| <b>JLU-MOF116</b>                                                                         | 0.25        | Ethanol          | 40 °C/2 h             | 95        | 380  | 3.17                     | This work |
| NUC-21                                                                                    | 0.3         | Solvent free     | 70 °C/1 h             | 97        | 323  | 5.38                     | 14        |
| [Co <sub>2</sub> (bptc)(H <sub>2</sub> O) <sub>2</sub> ] <sub>5</sub> DMA                 | 2           | Solvent free     | 60 °C/6 h             | > 99      | 50   | 0.14                     | 15        |
| MOF3                                                                                      | 0.25        | DMF              | RT/6 h                | 97        | 388  | 1.08                     | 16        |
| NUC-25                                                                                    | 0.4         | Solvent free     | 80 °C/24 h            | 99        | 248  | 0.17                     | 17        |
| [Zn(κN-H <sub>3</sub> L)(H <sub>2</sub> O) <sub>3</sub> ] <sub>3</sub> ·3H <sub>2</sub> O | 3           | THF              | 50 °C/4 h             | 94        | 31   | 0.13                     | 18        |
| NUC-38Yb                                                                                  | 0.3         | Ethanol          | 45 °C/24 h            | 96        | 1280 | 0.89                     | 19        |
| NUC-28                                                                                    | 0.3         | Ethanol          | 45 °C/24 h            | 96        | 320  | 0.22                     | 20        |
| UiO-66-NH-RNH <sub>2</sub>                                                                | 1           | Toluene          | RT/2 h                | 97        | 97   | 0.81                     | 21        |
| [Cu <sub>2</sub> (μ-H <sub>3</sub> ddba) <sub>2</sub> (phen) <sub>2</sub> ]               | 2           | H <sub>2</sub> O | 25 °C/1 h             | > 99      | 50   | 0.83                     | 22        |

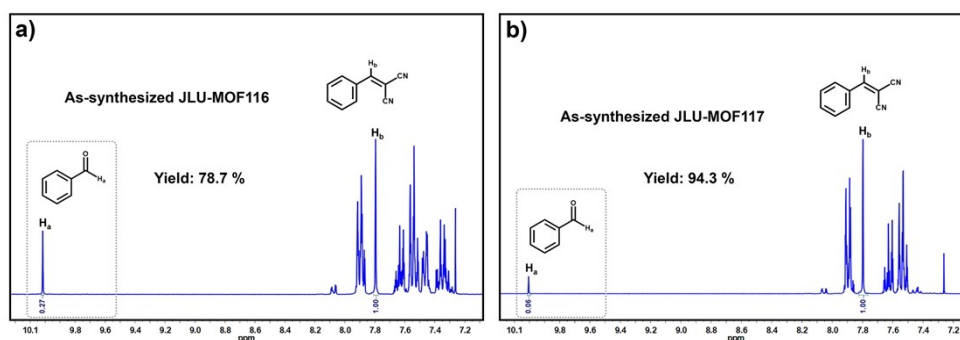

Fig. S53. The Knoevenagel condensation reactions by 0.25 mol as-synthesized **JLU-MOF116** and **JLU-MOF117**, respectively.

## Reference

1. J. Y. Qiao, B. R. Zhang, X. Y. Yu, X. Q. Zou, X. Y. Liu, L. R. Zhang and Y. L. Liu, *Inorg. Chem.*, 2022, **61**, 3708–3715.
2. Y. F. Zhang, Z. H. Zhang, L. Ritter, H. Fang, Q. Wang, B. Space. Y. B. Zhang, D. X. Xue and J. F. Bai, *J. Am. Chem. Soc.*, 2021, **143**, 12202–12211.
3. H. Jiang, J. T. Jia, A. Shkurenko, Z. J. Chen, K. Adil, Y. Belmabkhout, L. J. Weselinski, A. H. Assen, D. X. Xue, M. O’Keeffe and M. Eddaoudi, *J. Am. Chem. Soc.*, 2018, **140**, 8858–8867.
4. B. S. Zheng, J. F. Bai, J. G. Duan, L. Wojtas and M. J. Zaworotko, *J. Am. Chem. Soc.*, 2011, **133**, 748–751.
5. R. Grünker, V. Bon, P. Müller, U. Stoeck, S. Krause, U. Mueller, I. Senkovska and S. Kaskel, *Chem. Commun.*, 2014, **50**, 3450–3452.
6. S. K. Das, S. Chatterjee, S. Bhunia, A. Mondal, P. Mitra, V. Kumari, A. Pradhan and A. Bhaumik, *Dalton Trans.*, 2017, **46**, 13783–13792.
7. G. Chakraborty, P. Das and S. K. Mandal, *Inorg. Chem.*, 2021, **60**, 5071–5080.
8. H. Beyzavi, R. C. Klet, S. Tussupbayev, J. Borycz, N. A. Vermeulen, C. J. Cramer, J. F. Stoddart, J. T. Hupp and O. K. Farha, *J. Am. Chem. Soc.*, 2014, **136**, 15861–15864.
9. L. Liu, S. M. Wang, Z. B. Han, M. L. Ding, D. Q. Yuan and H. L. Jiang, *Inorg. Chem.*, 2016, **55**, 3558–3565.
10. X. Y. Li, L. N. Ma, Y. Liu, L. Hou, Y. Y. Wang and Z. H. Zhu, *ACS Appl. Mater. Interfaces*, 2018, **10**, 10965–10973.
11. X. Y. Li, Y. Z. Li, Y. Yang, L. Hou, Y. Y. Wang and Z. H. Zhu, *Chem. Commun.*, 2017, **53**, 12970–12973.
12. J. Zheng, M. Y. Wu, F. L. Jiang, W. P. Su and M. C. Hong, *Chem. Sci.*, 2015, **6**, 3466–3470.
13. G. Y. Zhang, G. F. Wei, Z. P. Liu, S. R. J. Oliver and H. H. Fei, *Chem. Mater.*, 2016, **28**, 6276–6281.
14. H. T. Chen, L. M. Fan and X. T. Zhang, *ACS Appl. Mater. Interfaces*, 2020, **12**, 54884–54892.
15. J. B. Deng, X. Wang, Z. Q. Ni and F. Zhu, *Arab. J. Chem.*, 2020, **13**, 7482–7489.
16. Y. Y. Zhang, Q. Liu, L. Y. Zhang, Y. M. Bao, J. Y. Tan, N. Zhang, J. Y. Zhang and Z. J. Liu, *Dalton Trans.*, 2021, **50**, 647–659.
17. H. Chen, T. Hu, L. Fan and X. Zhang, *Inorg. Chem.*, 2021, **60**, 1028–1036.
18. A. Karmakar, A. Paul, K. T. Mahmudov, M. F. C. Guedes da Silva and A. J. L. Pombeiro, *New J. Chem.*, 2016, **40**, 1535–1546.
19. T. Zhang, H. Chen, S. Liu, H. Lv, X. Zhang and Q. Li, *ACS Catal.*, 2021, **11**, 14916–14925.
20. T. Zhang, Z. Zhang, H. Chen, X. Zhang and Q. Li, *Cryst. Growth Des.*, 2021, **22**, 304–312.
21. Y. Luan, Y. Qi, H. Gao, R. S. Andriamitantsoa, N. Zheng and G. Wang, *J. Mater. Chem. A*, 2015, **3**, 17320–17331.
22. H. R. Zhang, J. Z. Gu, M. V. Kirillova and A. M. Kirillov, *Inorg. Chem. Front.*, 2021, **8**, 4209–4221.
